# Supplementary material for: An amide-based second coordination sphere promotes the dimer pathway of Mn-catalyzed CO2-to-CO reduction at low overpotential
Source: Royal Society of Chemistry journal article supplement (doi:10.1039/d0sc05679k), 2021-01-01
Supplement: d0sc05679k2.pdf [file d0sc05679k2.pdf]

## **Amide-based second coordination sphere promotes the dimer pathway of Mn-catalyzed CO<sub>2</sub>-to-CO reduction at low overpotential**

Yong Yang,<sup>a</sup> Mehmed Z. Ertem <sup>\*b</sup> and Lele Duan <sup>\*a</sup>

<sup>a</sup>Department of Chemistry, Shenzhen Grubbs Institute and Guangdong Provincial Key Laboratory of Energy Materials for Electric Power, Southern University of Science and Technology, Shenzhen, 518055, China

<sup>b</sup>Chemistry Division, Energy & Photon Sciences, Brookhaven National Laboratory, Upton, NY 11973-5000

## Ligand exchange study.

It is well known that the axial bromo ligand of  $[fac\text{-Mn}(\text{N}^{\wedge}\text{N})(\text{CO})_3\text{Br}]$  can be partially replaced by  $\text{CH}_3\text{CN}$  in the acetonitrile solution. CVs of  $[\mathbf{1}\text{-Br}]$  in Ar-saturated dry  $\text{CH}_3\text{CN}$  containing 0.10 M of tetrabutylammonium hexafluorophosphate (TBAP) showed three irreversible reduction waves at  $-1.51$ ,  $-1.59$  and  $-1.76$  V (Figure S20). The ligand exchange reaction was studied using FTIR spectroscopy in the dry  $\text{CH}_3\text{CN}$  (Figure S26b) and the mixed  $\text{CH}_3\text{CN}/\text{H}_2\text{O}$  (catalytic conditions; Figure S26a), respectively. Apparently, the solvolysis of  $[\mathbf{1}\text{-Br}]$  to  $[\mathbf{1}\text{-MeCN}]\text{Br}$  occurs much faster in the mixed acetonitrile/water than in the dry  $\text{CH}_3\text{CN}$ . Nevertheless, a mixture of  $[\mathbf{1}\text{-Br}]$  and  $[\mathbf{1}\text{-MeCN}]\text{Br}$  was obtained during the time scale of preparing the CV experiments. Additionally, the CV of complex ( $[\mathbf{1}\text{-MeCN}](\text{OTf})$ ) was measured under the same conditions (Figure S24), which displayed only two reduction waves. Accordingly, the first and second reduction waves of  $[\mathbf{1}\text{-Br}]$  are actually corresponding to the one-electron reduction process of  $[\mathbf{1}\text{-MeCN}]^+$  and  $[\mathbf{1}\text{-Br}]$ , respectively. These two peaks could not be separated clearly by varying the scan rate (Figure S25). After one-electron reduction, the resulting  $\text{Mn}^0$  species undergoes fast bromo dissociation (EC mechanism), forming 5-coordinate  $[\text{Mn}^l(\text{bpy}\text{-CONHMe})^-(\text{CO})_3]$  ( $[\mathbf{1}]^0$ ). This  $[\mathbf{1}]^0$  monomer is prone to dimerization to yield  $[\mathbf{1}_2]^0$  which could be further reduced at  $E = -1.76$  V, leading to the formation of  $[\text{Mn}^0(\text{bpy}\text{-CONHMe})^-(\text{CO})_3]$  ( $[\mathbf{1}]^-$ ) (CEC mechanism; Figure S20).<sup>1-4</sup> At the reverse scan, the oxidation of  $[\mathbf{1}]^0$  to  $[\mathbf{1}]^+$  was observed at  $-1.46$  V while the oxidation wave at  $-0.76$  V assigned as the oxidation of  $[\mathbf{1}_2]^0$  dimer.<sup>5,6</sup> The scan rate dependence measurements (Figure S25) disclose that although the oxidation waves at  $-1.46$  V (ox1) and  $-0.76$  V (ox2) are both growing upon increasing the scan rate, the ratio of  $i_{\text{ox1}}/i_{\text{ox2}}$  also increased (Table S7) indicating that the dimer formation is inhibited at higher scanning rates. After addition of water to the electrolyte (5.51 M  $\text{H}_2\text{O}$ ) under Ar conditions, the reduction wave of  $[\mathbf{1}\text{-Br}]$  to  $[\mathbf{1}\text{-Br}]^0$  at  $-1.59$  V disappeared and only the reduction wave of  $[\mathbf{1}\text{-MeCN}]^+$  to  $[\mathbf{1}\text{-MeCN}]^0$  remained (Figures S20b), due to the fast ligand exchange in the presence of water.

## References

- (1) M. D. Sampson, A. D. Nguyen, K. A. Grice, C. E. Moore, A. L. Rheingold and C. P. Kubiak, *J. Am. Chem. Soc.*, 2014, **136**, 5460-5471.
- (2) F. Franco, M. F. Pinto, B. Royo and J. Lloret-Fillol, *Angew. Chem. Int. Ed.*, 2018, **57**, 4603-4606.
- (3) D. C. Grills, M. Z. Ertem, M. McKinnon, K. T. Ngo and J. Rochford, *Coord. Chem. Rev.*, 2018, **374**, 173-217.
- (4) K. T. Ngo, M. McKinnon, B. Mahanti, R. Narayanan, D. C. Grills, M. Z. Ertem and J. Rochford, *J. Am. Chem. Soc.*, 2017, **139**, 2604-2618.
- (5) M. Bourrez, F. Molton, S. Chardon-Noblat and A. Deronzier, *Angew. Chem. Int. Ed.*, 2011, **50**, 9903-9906.
- (6) J. M. Smieja, M. D. Sampson, K. A. Grice, E. E. Benson, J. D. Froehlich and C. P. Kubiak, *Inorg. Chem.*, 2013, **52**, 2484-2491.

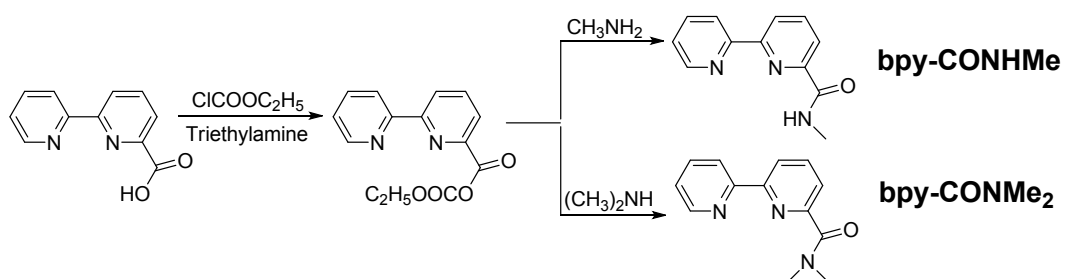

**Figure S1.** Synthesis of ligands of **bpy-CONHMe** and **bpy-CONMe<sub>2</sub>**.

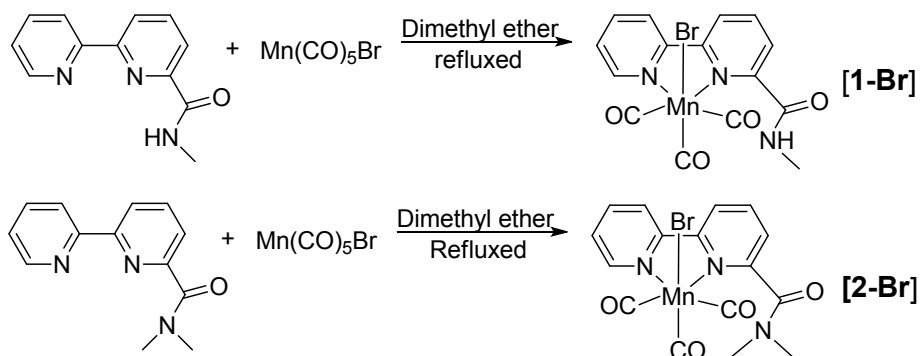

**Figure S2.** Synthesis of manganese complexes **[1-Br]** and **[2-Br]**.

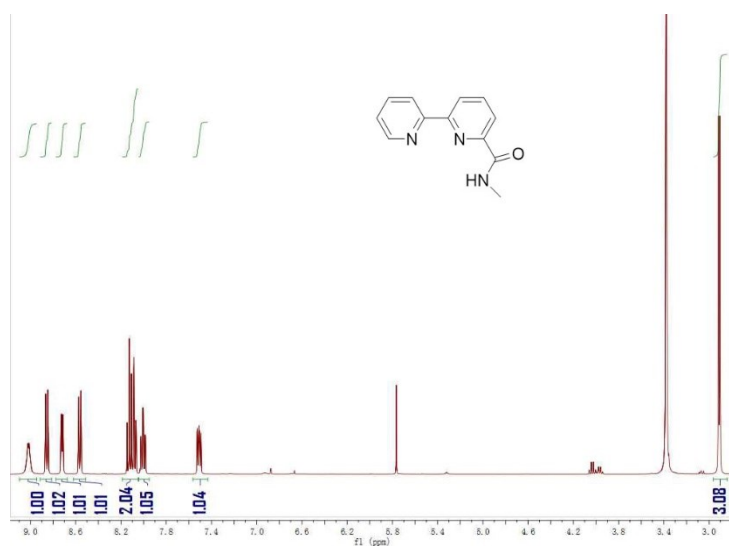

**Figure S3.** <sup>1</sup>H NMR spectrum in  $\text{DMSO-d}_6$  of ligand **bpy-CONHMe**.

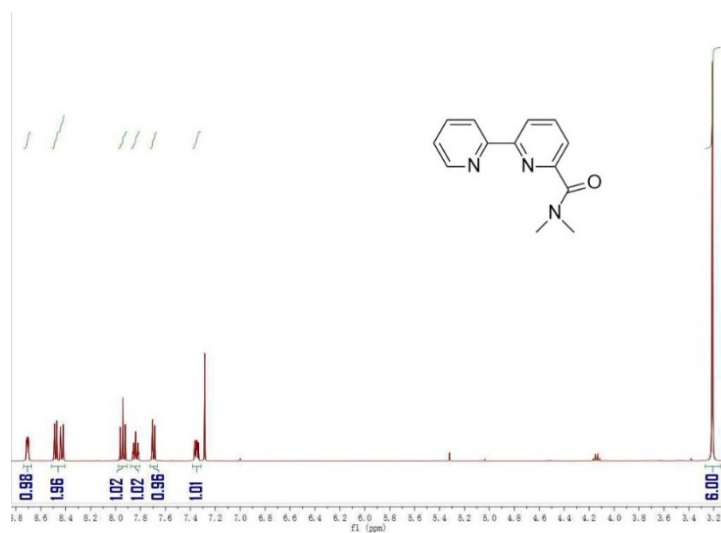

Figure S4.  $^1\text{H}$  NMR spectrum in  $\text{CDCl}_3$  of ligand **bpy-CONMe<sub>2</sub>**.

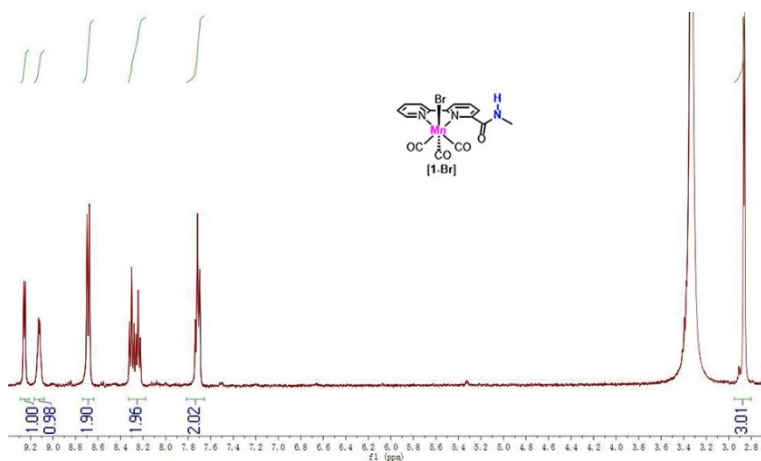

Figure S5.  $^1\text{H}$  NMR spectrum in  $\text{DMSO-d}_6$  of complex **[1-Br]**.

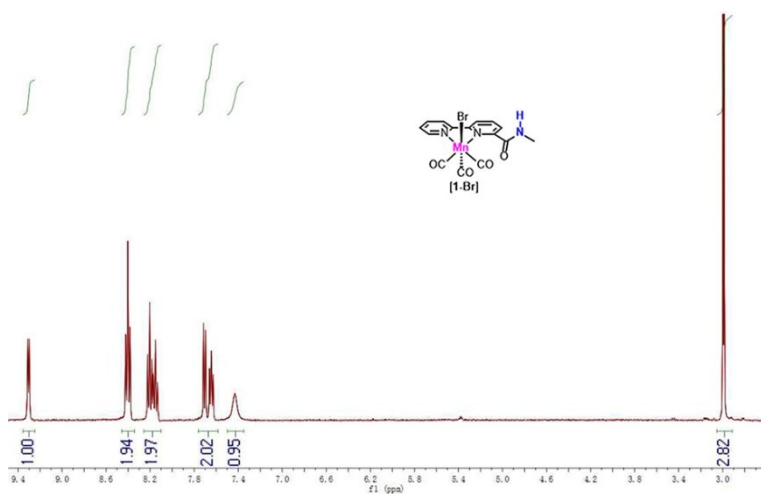

Figure S6.  $^1\text{H}$  NMR spectrum in  $\text{CD}_3\text{CN}$  of complex **[1-Br]**.

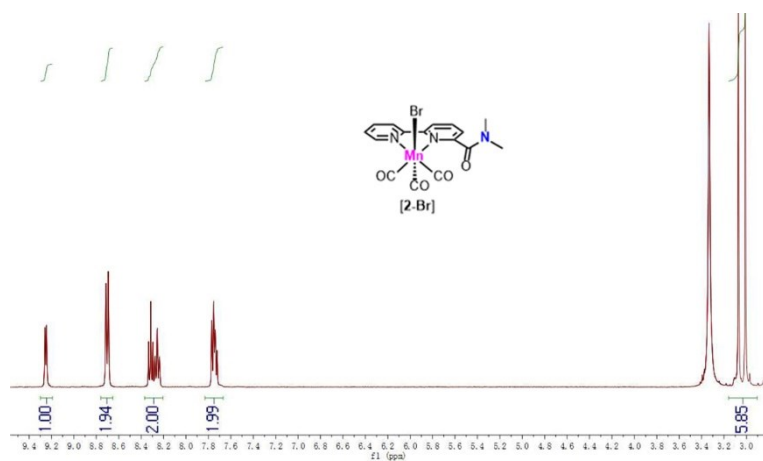

Figure S7. <sup>1</sup>H NMR spectrum in DMSO-d<sub>6</sub> of complex [2-Br].

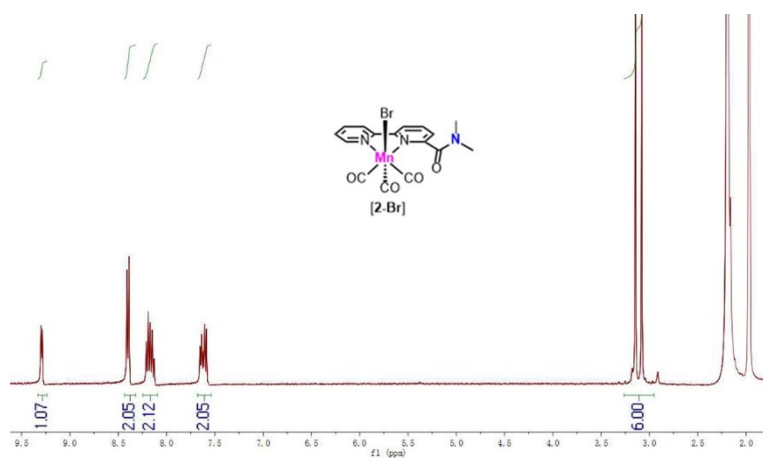

Figure S8. <sup>1</sup>H NMR spectrum in CD<sub>3</sub>CN of complex [2-Br].

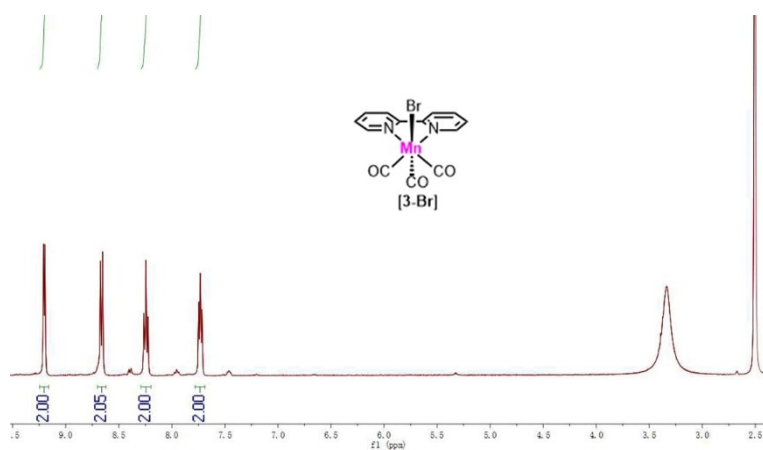

Figure S9. <sup>1</sup>H NMR spectrum in DMSO-d<sub>6</sub> of complex [3-Br].

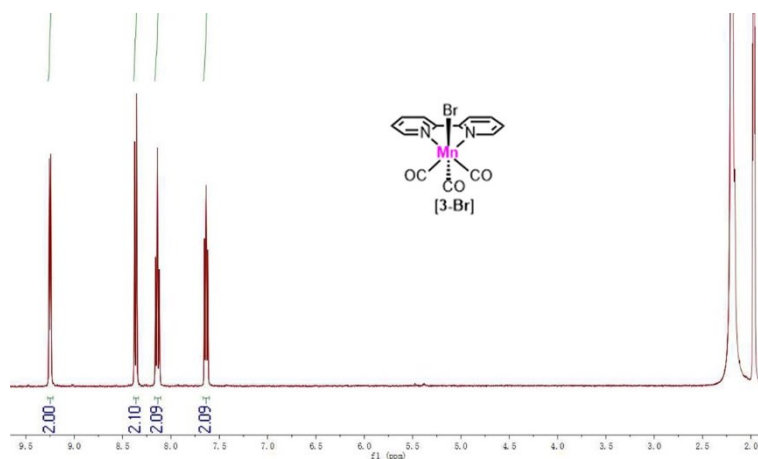

**Figure S10.**  $^1\text{H}$  NMR spectrum in  $\text{CD}_3\text{CN}$  of complex **[3-Br]**.

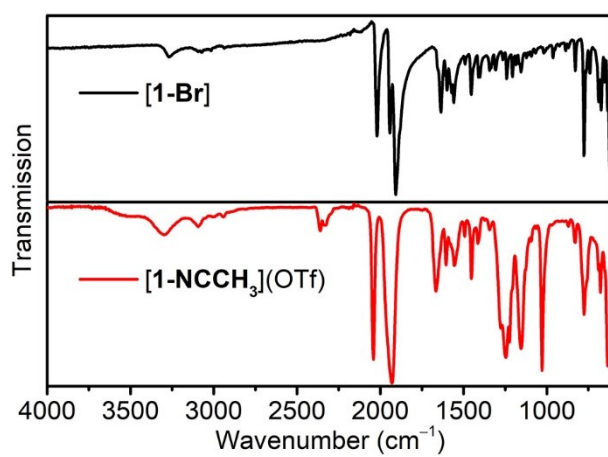

**Figure S11.** ATR-IR spectra of complexes **[1-Br]** and **[1-MeCN](OTf)**.

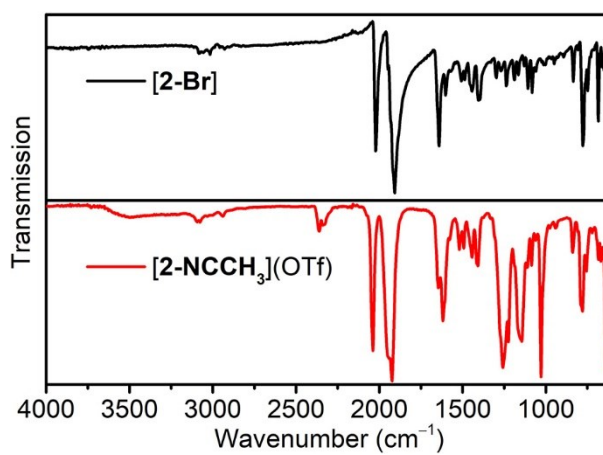

**Figure S12.** ATR-IR spectra of complexes **[2-Br]** and **[2-MeCN](OTf)**.

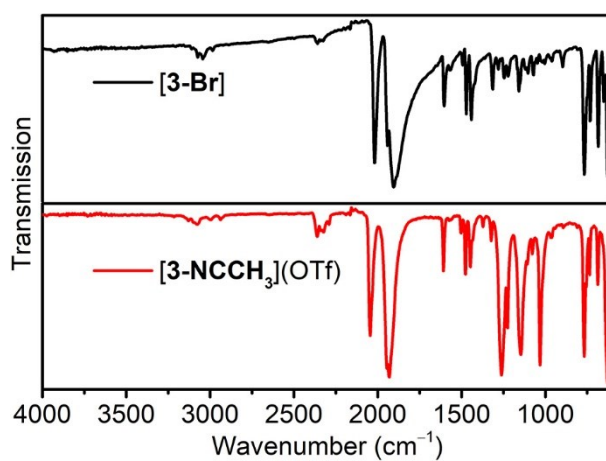

Figure S13. ATR-IR spectra of complexes [3-Br] and [3-MeCN](OTf).

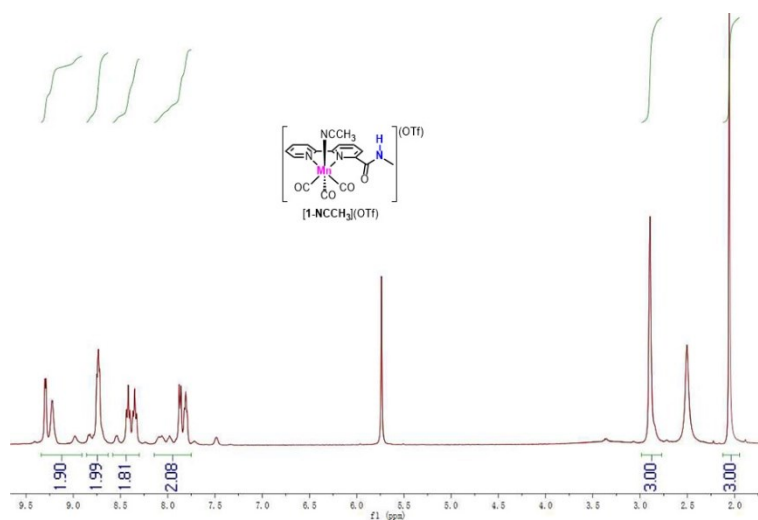

Figure S14.  $^1\text{H}$  NMR spectrum in  $\text{DMSO-d}_6$  of complex [1-MeCN](OTf).

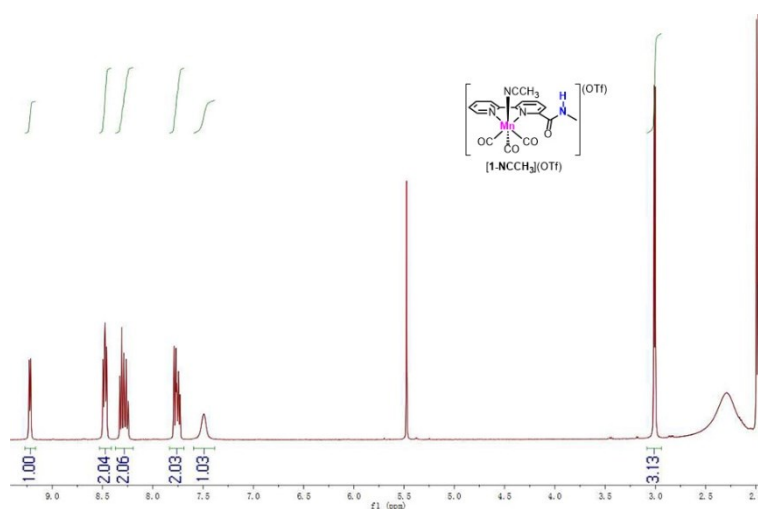

Figure S15.  $^1\text{H}$  NMR spectrum in  $\text{CD}_3\text{CN}$  of complex [1-MeCN](OTf).

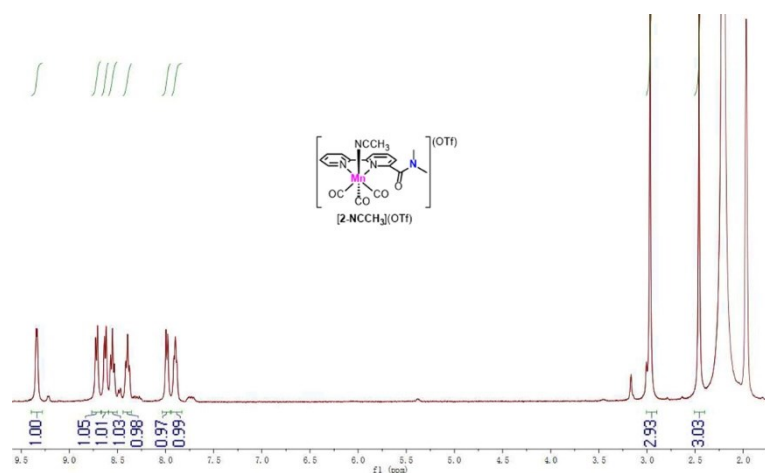

**Figure S16.**  $^1\text{H NMR}$  spectrum in  $\text{CD}_3\text{CN}$  of complex  $[2\text{-MeCN}](\text{OTf})$ .

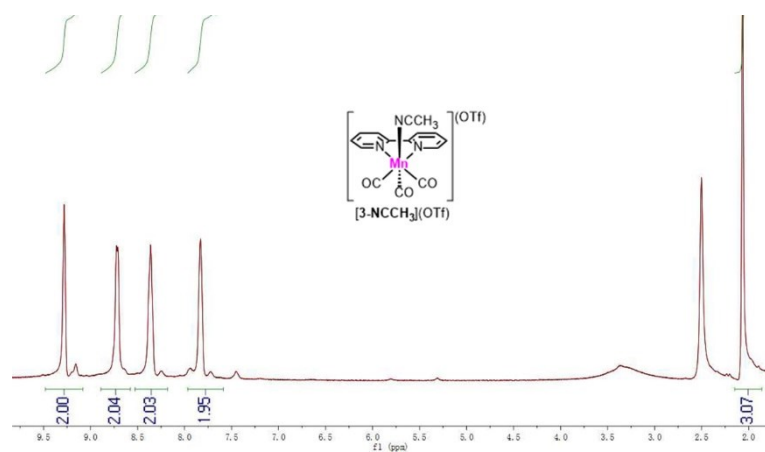

**Figure S17.**  $^1\text{H NMR}$  spectrum in  $\text{DMSO-d}_6$  of complex  $[3\text{-MeCN}](\text{OTf})$ .

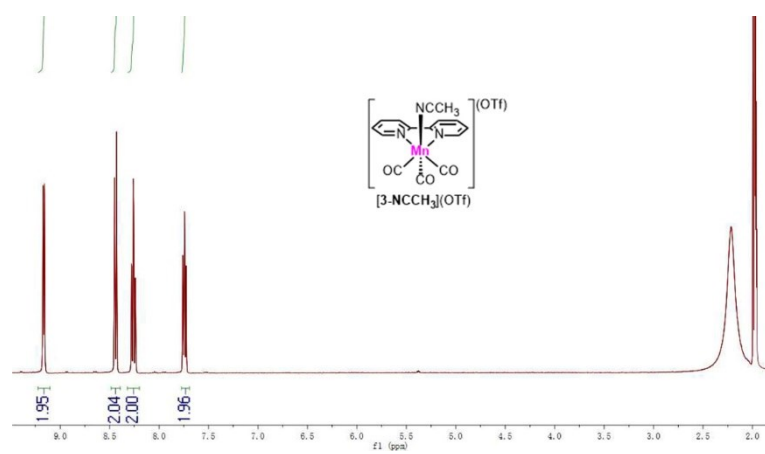

**Figure S18.**  $^1\text{H NMR}$  spectrum in  $\text{CD}_3\text{CN}$  of complex  $[3\text{-MeCN}](\text{OTf})$ .



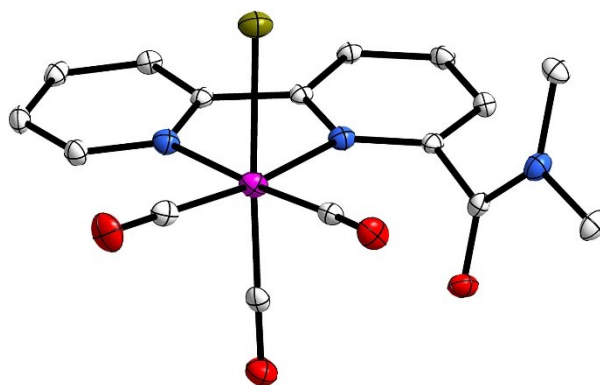

**Figure S19.** X-ray crystal structure of [2-Br] with ellipsoids at the 50% probability level.

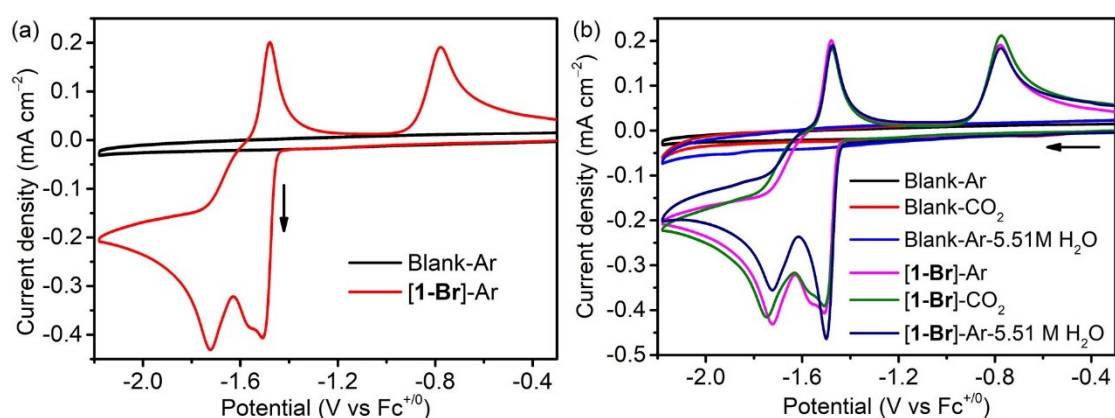

**Figure S20.** CVs of [1-Br] (1 mM), under Ar (black), CO<sub>2</sub> (red), Ar with 5.51 M H<sub>2</sub>O added (blue) and CO<sub>2</sub> with 5.51 M H<sub>2</sub>O added in anhydrous CH<sub>3</sub>CN with TBAP (0.1 M) as electrolyte. *Note: It took longer time to prepare the CO<sub>2</sub> saturated solution than the Ar saturated solution, so the concentration of the MeCN-bound species would be higher in the CO<sub>2</sub> saturated solution than the Ar saturated solution, leading to the difference in their CVs.*

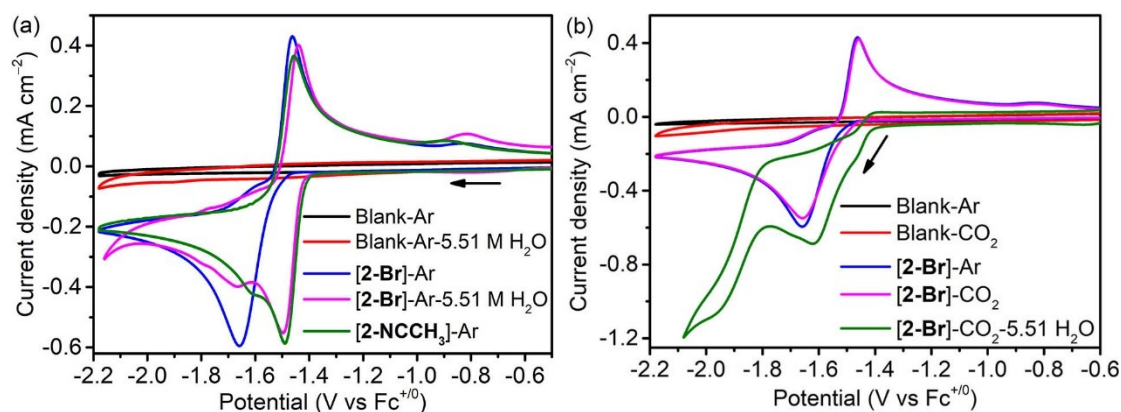

**Figure S21.** (a) CVs of [2-Br] (1 mM) in anhydrous CH<sub>3</sub>CN with TBAP (0.1 M) as electrolyte under Ar (blue), Ar with 5.51 M H<sub>2</sub>O added (purple) and CV of [2-MeCN](OTf) (1 mM) in anhydrous CH<sub>3</sub>CN with TBAP (0.1 M) as electrolyte under Ar (green); (b) CVs of [2-Br] (1 mM) in anhydrous CH<sub>3</sub>CN with TBAP (0.1 M) as electrolyte under CO<sub>2</sub> (purple), CO<sub>2</sub> with 5.51 M H<sub>2</sub>O added (green).

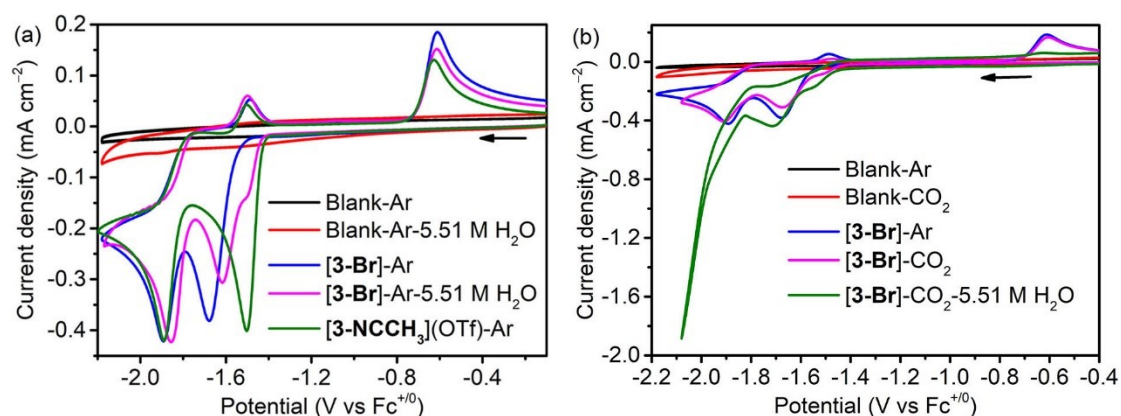

**Figure S22.** (a) CVs of [3-Br] (1 mM) in anhydrous CH<sub>3</sub>CN with TBAP (0.1 M) as electrolyte under Ar (blue), Ar with 5.51 M H<sub>2</sub>O added (purple) and CV of and [3-MeCN](OTf) (1 mM) in anhydrous CH<sub>3</sub>CN with TBAP (0.1 M) as electrolyte under Ar (green); (b) CVs of [3-Br] (1 mM) in anhydrous CH<sub>3</sub>CN with TBAP (0.1 M) as electrolyte under CO<sub>2</sub> (purple), CO<sub>2</sub> with 5.51 M H<sub>2</sub>O added (green).

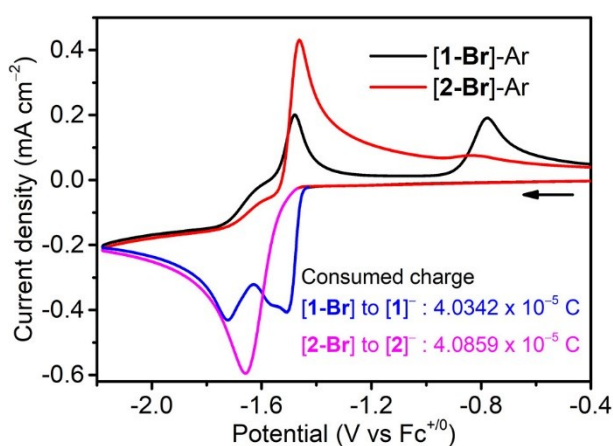

**Figure S23.** CVs of [1-Br] (1 mM) and [2-Br] (1 mM) in anhydrous CH<sub>3</sub>CN with TBAP (0.1 M) as electrolyte under an inter atmosphere (Ar) with the peak integration corresponding to the consumed charges. Due to the steric influence of the amide -NMe<sub>2</sub> group, complex [2-Br] under dry conditions displayed a similar electrochemical property to complex [Mn(mesbpy)(CO)<sub>3</sub>Br]<sup>1</sup> which exhibited a single, two-electron reduction wave (Figure S24). As shown in Figure S23, the consumed charge of the reduction wave at -1.61 V (4.0859 x 10<sup>-5</sup> C) for complex [2-Br] is similar with that of the sum of the first two one-electron processes of [1-Br] (4.0342 x 10<sup>-5</sup> C). We thereby assigned the reduction wave as a two-electron reduction process.

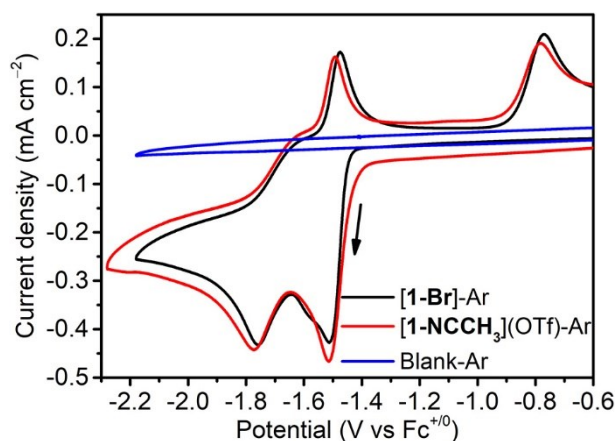

**Figure S24.** CVs of [1-Br] (1 mM) and [1-MeCN](OTf) (1 mM) in anhydrous CH<sub>3</sub>CN with TBAP (0.1 M) as electrolyte under an inter atmosphere (Ar).

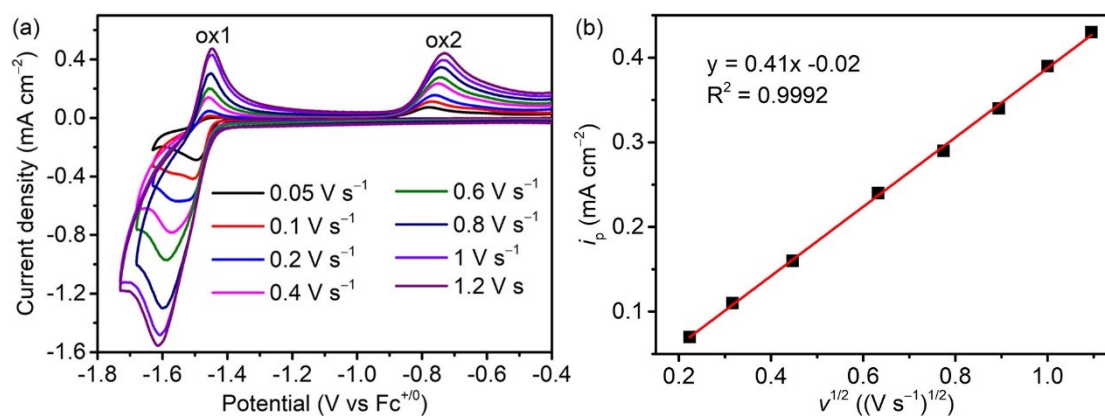

**Figure S25.** (a) CVs of [1-Br] (1 mM) in Ar-saturated CH<sub>3</sub>CN with 0.1 M TBAP at different scan rate (0.05 – 1.2 V s<sup>-1</sup>); (b) The linear plot of  $i_{ox2}$  versus  $v^{1/2}$  for CVs of [1-Br].

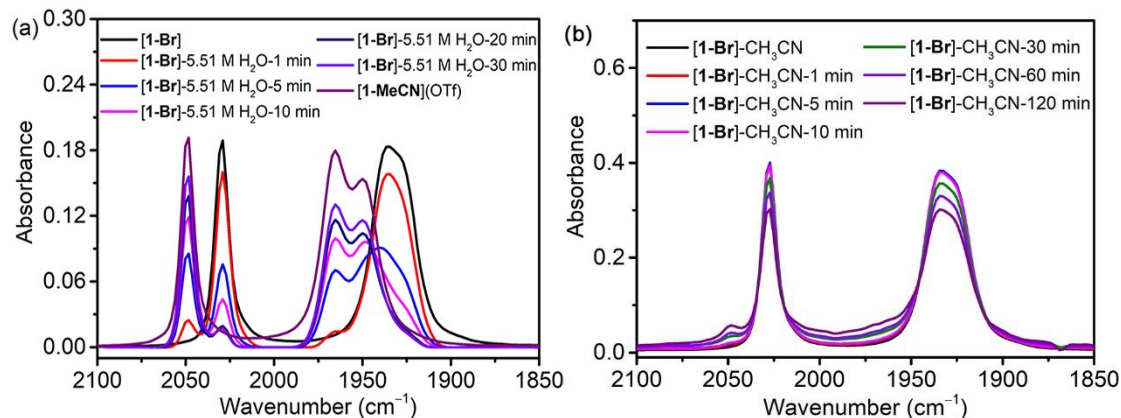

**Figure S26.** FTIR spectral change versus time plot of complex [1-Br] (1 mM) in (a) CH<sub>3</sub>CN solution with 5.51 M H<sub>2</sub>O and (b) CH<sub>3</sub>CN solution.

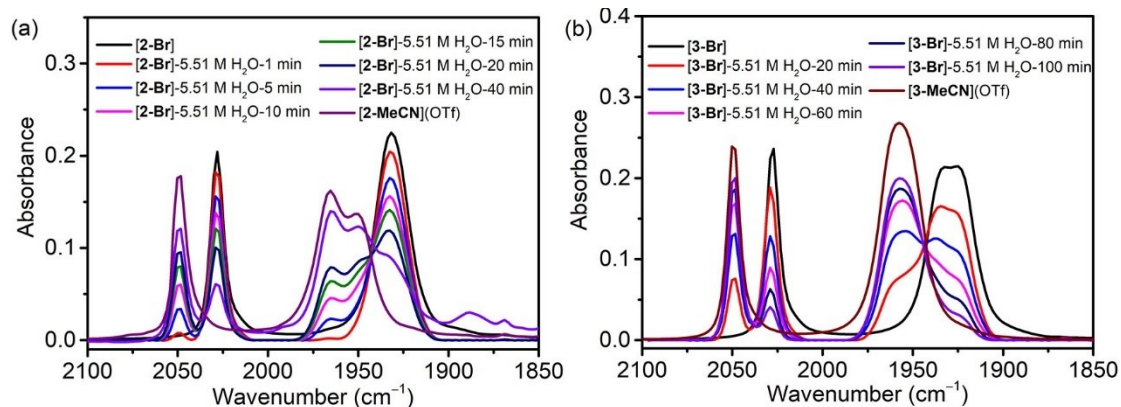

**Figure S27.** (a) FTIR spectral change versus time plot of complex **[2-Br]** (1 mM) in  $\text{CH}_3\text{CN}$  solution with 5.51 M  $\text{H}_2\text{O}$  and FTIR spectrum of complex **[2-MeCN](OTf)** in  $\text{CH}_3\text{CN}$  solution; (b) FTIR spectral change versus time plot of complex **[3-Br]** (1 mM) in  $\text{CH}_3\text{CN}$  solution with 5.51 M  $\text{H}_2\text{O}$  and FTIR spectrum of complex **[3-MeCN](OTf)** in  $\text{CH}_3\text{CN}$  solution.

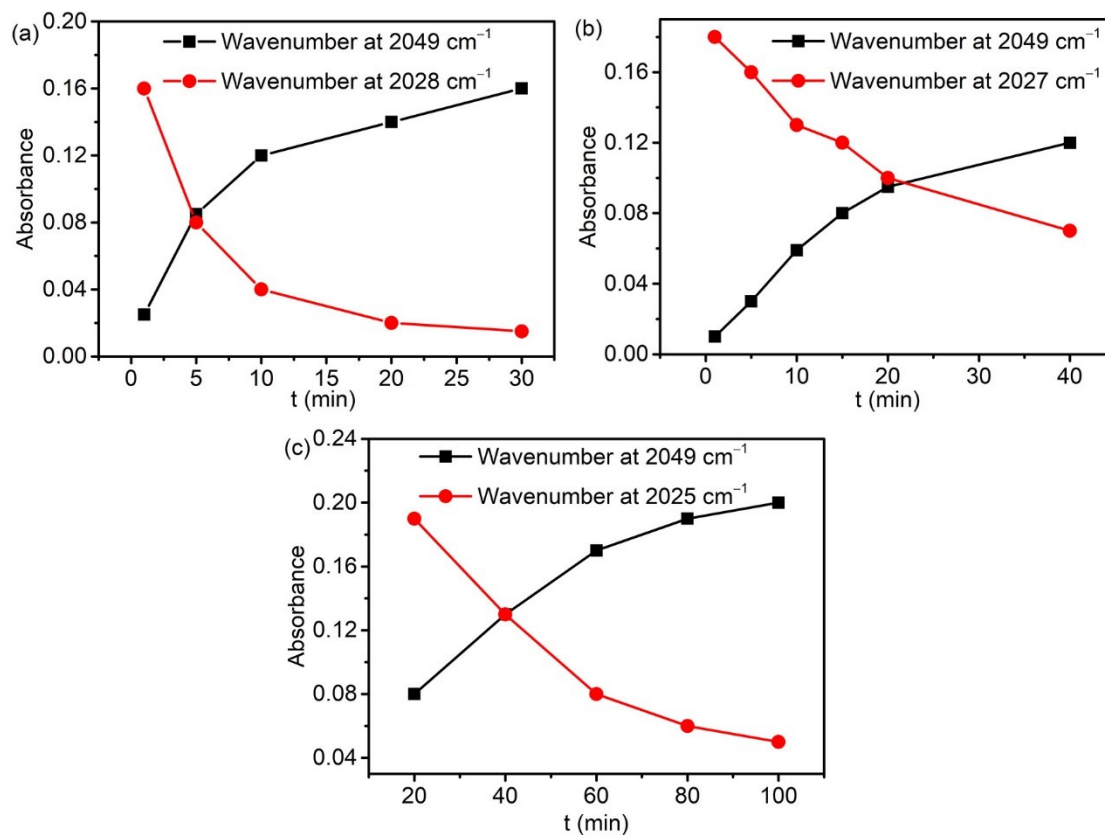

**Figure S28.** The plots of  $\nu_{\text{CO}}$  absorbance as a function of time for (a) **[1-Br]** (1 mM) at 2049 and 2028  $\text{cm}^{-1}$ , (b) **[2-Br]** (1 mM) at 2049 and 2027  $\text{cm}^{-1}$  and (c) **[3-Br]** (1 mM) at 2049 and 2025  $\text{cm}^{-1}$ . Reaction conditions:  $\text{CH}_3\text{CN}$  solution with 5.51 M  $\text{H}_2\text{O}$ .

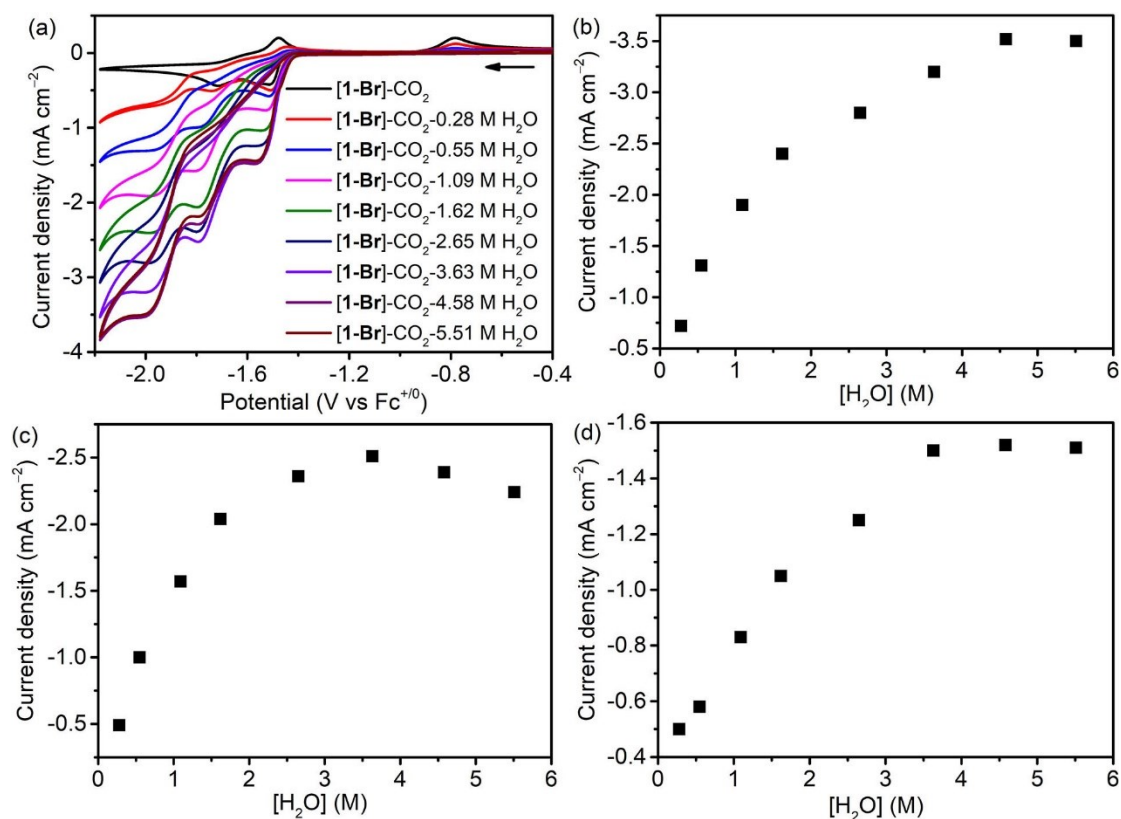

**Figure S29.** (a) CVs of the [1-Br] (1 mM) in CH<sub>3</sub>CN with TBAP (0.1 M) as electrolyte under saturated CO<sub>2</sub> with the addition of H<sub>2</sub>O (0.28–5.51 M H<sub>2</sub>O); The plots of the catalytic current as a function of the water concentration for the (b) third, (c) second and (d) first catalytic waves.

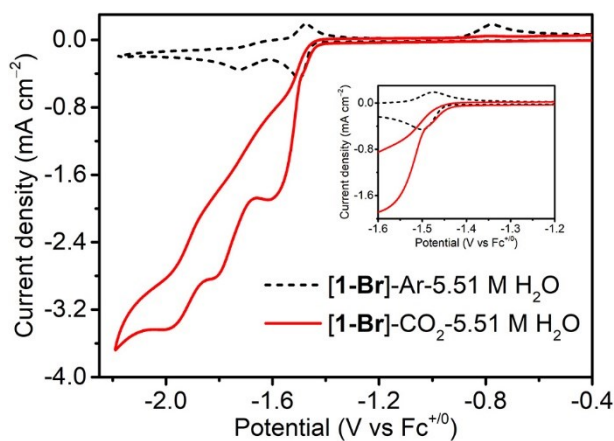

**Figure S30.** CVs of [1-Br] (1 mM) with 5.51 M H<sub>2</sub>O added in anhydrous CH<sub>3</sub>CN with TBAP (0.1 M) as electrolyte under Ar (black), CO<sub>2</sub> (red) atmosphere.

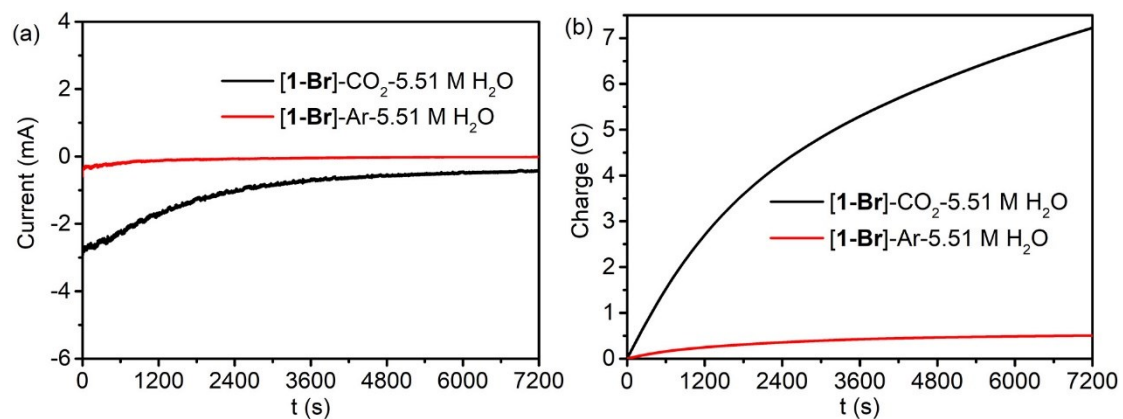

**Figure S31.** (a) Current vs time plots for the CPE and (b) charge passed during CPE of [1-Br] (1 mM) in 0.1 M TBAP/CH<sub>3</sub>CN with 5.51 M H<sub>2</sub>O at  $E_{app} = -1.55$  V under CO<sub>2</sub>-saturated atmosphere (black) and under Ar-saturated atmosphere (red).

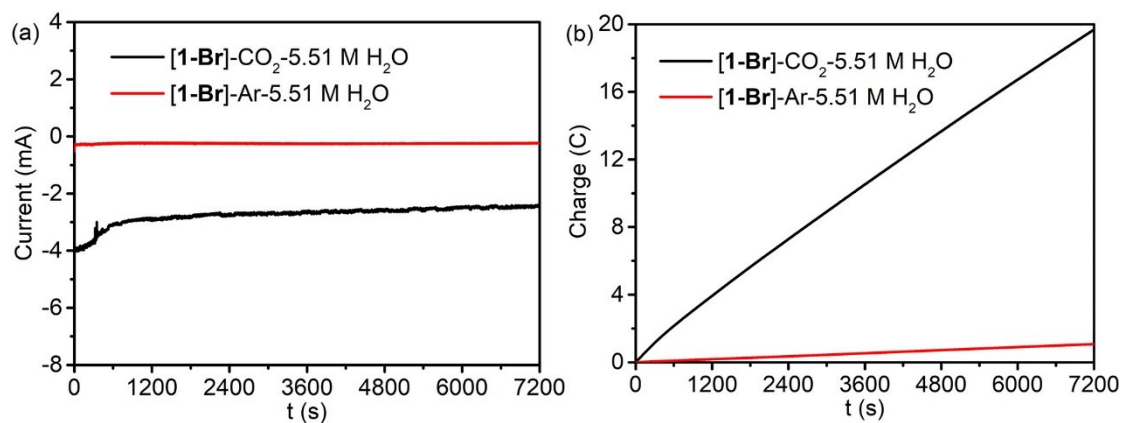

**Figure S32.** Current vs time plots for the CPE and (b) charge passed during CPE of [1-Br] (1 mM) in 0.1 M TBAP/CH<sub>3</sub>CN with 5.51 M H<sub>2</sub>O at  $E_{app} = -1.85$  V under CO<sub>2</sub>-saturated atmosphere (black) and under Ar-saturated atmosphere (red).

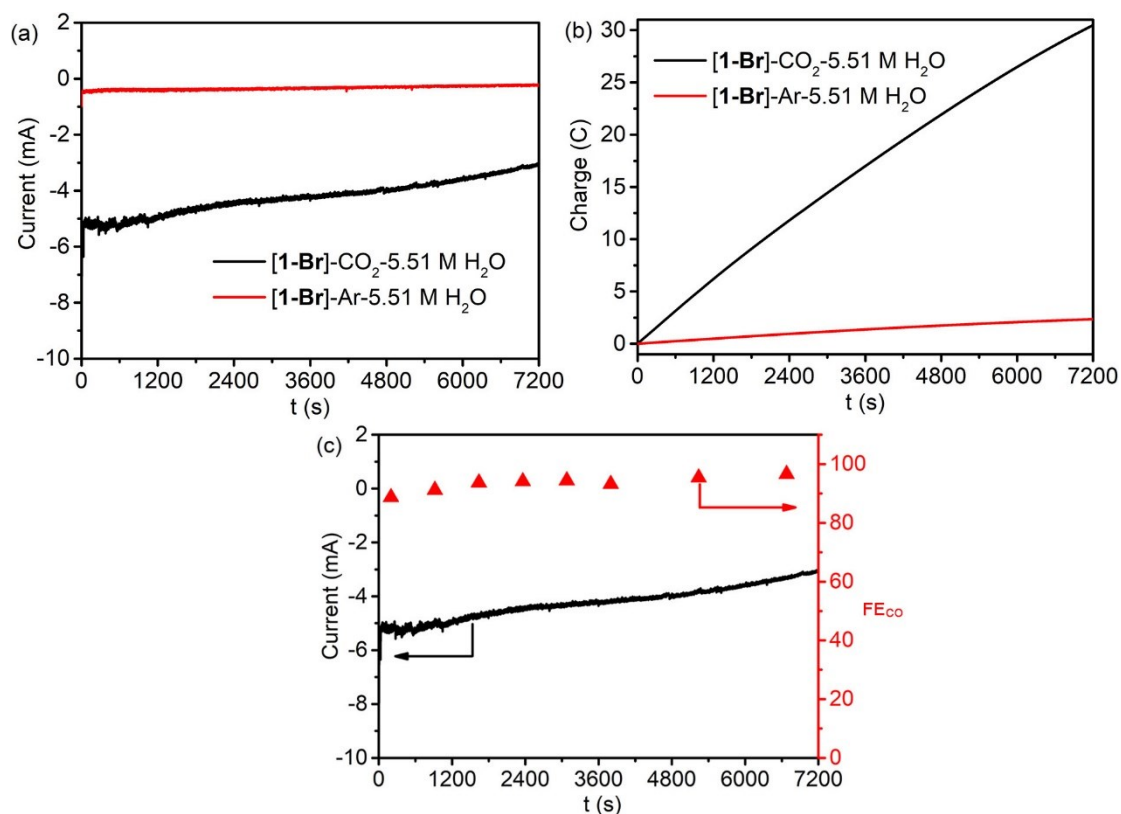

**Figure S33.** (a) Current vs time plots for the CPE and (b) charge passed during CPE of [1-Br] (1 mM) in 0.1 M TBAP/CH<sub>3</sub>CN under CO<sub>2</sub> with 5.51 M H<sub>2</sub>O at  $E_{app} = -2.05$  V; (c) Faradaic efficiency for CO production over electrolysis time during CPE of [1-Br] (1 mM) in 0.1 M TBAP/CH<sub>3</sub>CN under CO<sub>2</sub> with 5.51 M H<sub>2</sub>O at  $E_{app} = -2.05$  V.

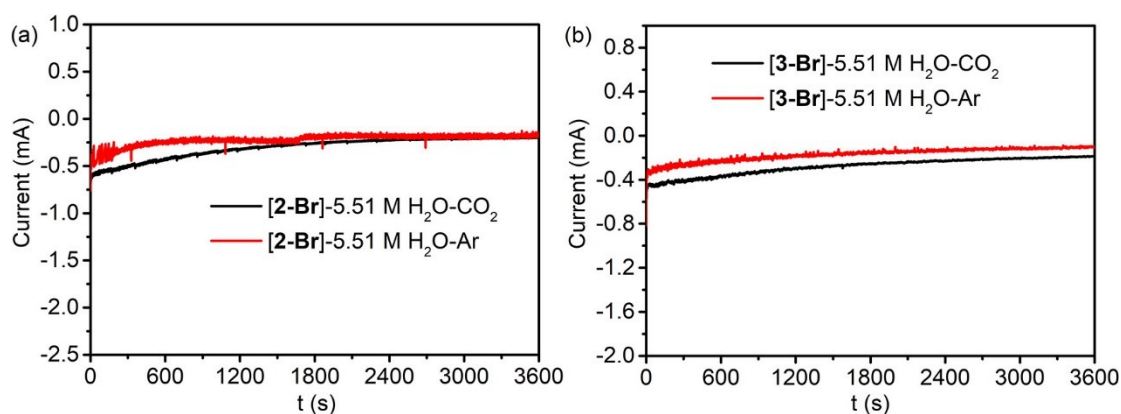

**Figure S34.** Current vs time plots for the CPE of complexes (a) [2-Br] and (b) [3-Br] (1 mM) in 0.1 M TBAP/CH<sub>3</sub>CN with 5.51 M H<sub>2</sub>O at  $E_{app} = -1.85$  V under CO<sub>2</sub>-saturated atmosphere (black) and under Ar-saturated atmosphere (red).

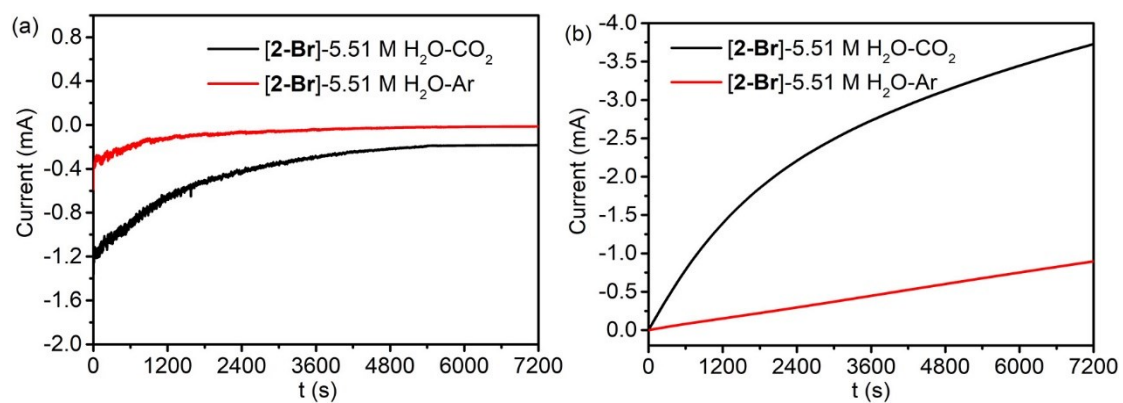

**Figure S35.** (a) Current vs time plots for the CPE and (b) charge passed during CPE of [2-Br] (1 mM) in 0.1 M TBAP/CH<sub>3</sub>CN with 5.51 M H<sub>2</sub>O at  $E_{app} = -2.05$  V under CO<sub>2</sub>-saturated atmosphere (black) and under Ar-saturated atmosphere (red).

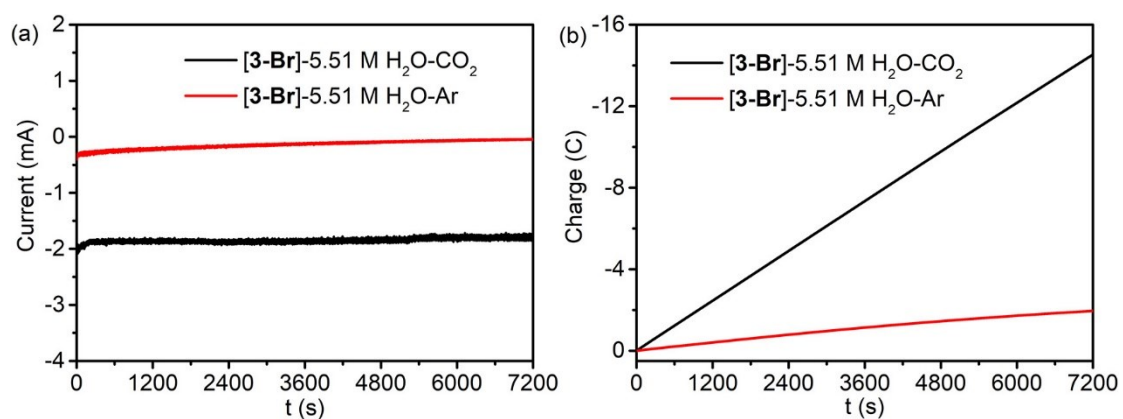

**Figure S36.** (a) Current vs time plots for the CPE and (b) charge passed during CPE of [3-Br] (1 mM) in 0.1 M TBAP/CH<sub>3</sub>CN with 5.51 M H<sub>2</sub>O at  $E_{app} = -2.05$  V under CO<sub>2</sub>-saturated atmosphere (black) and under Ar-saturated atmosphere (red).



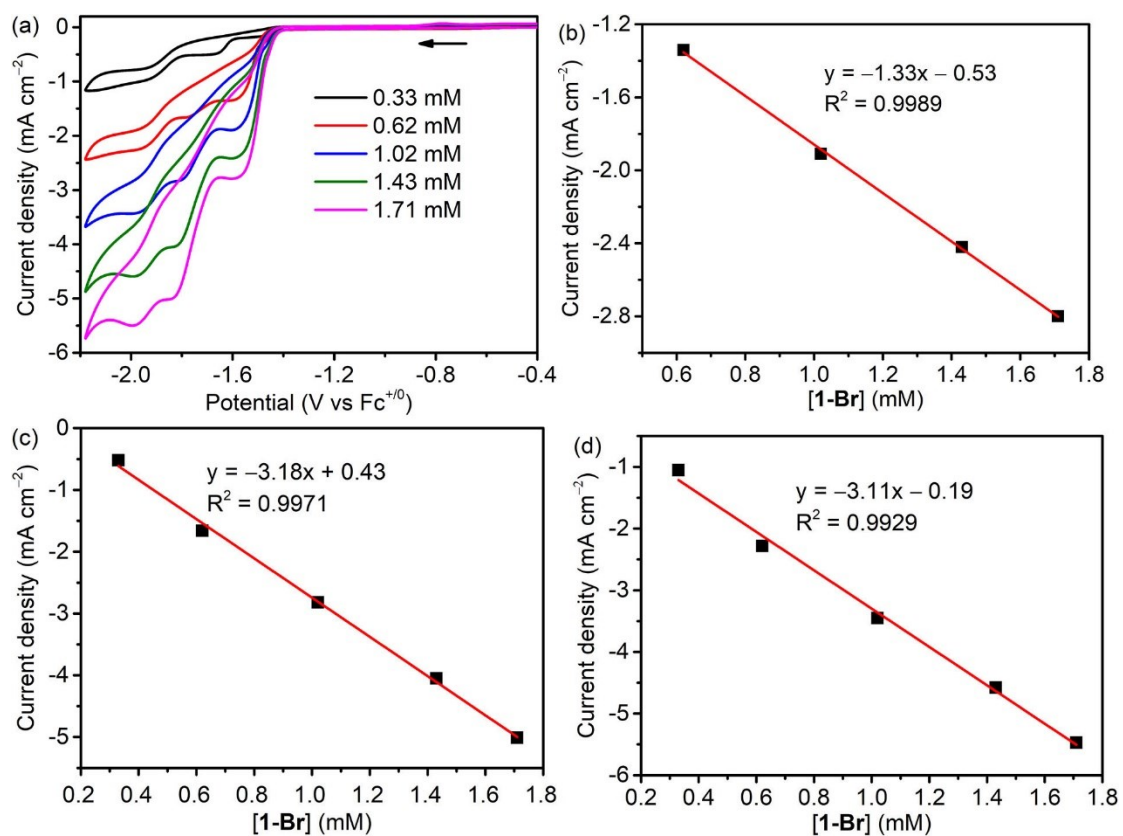

**Figure S37.** (a) CVs of complex [1-Br] at various concentrations (0.33–1.71 mM) in CO<sub>2</sub>-saturated CH<sub>3</sub>CN with 0.1 M TBAP as electrolyte at scan rate 100 mV s<sup>-1</sup>; The linear plot of  $i_{cat}$  versus catalyst concentration of (b) first, (c) second and (d) third catalytic waves for CVs of [1-Br].

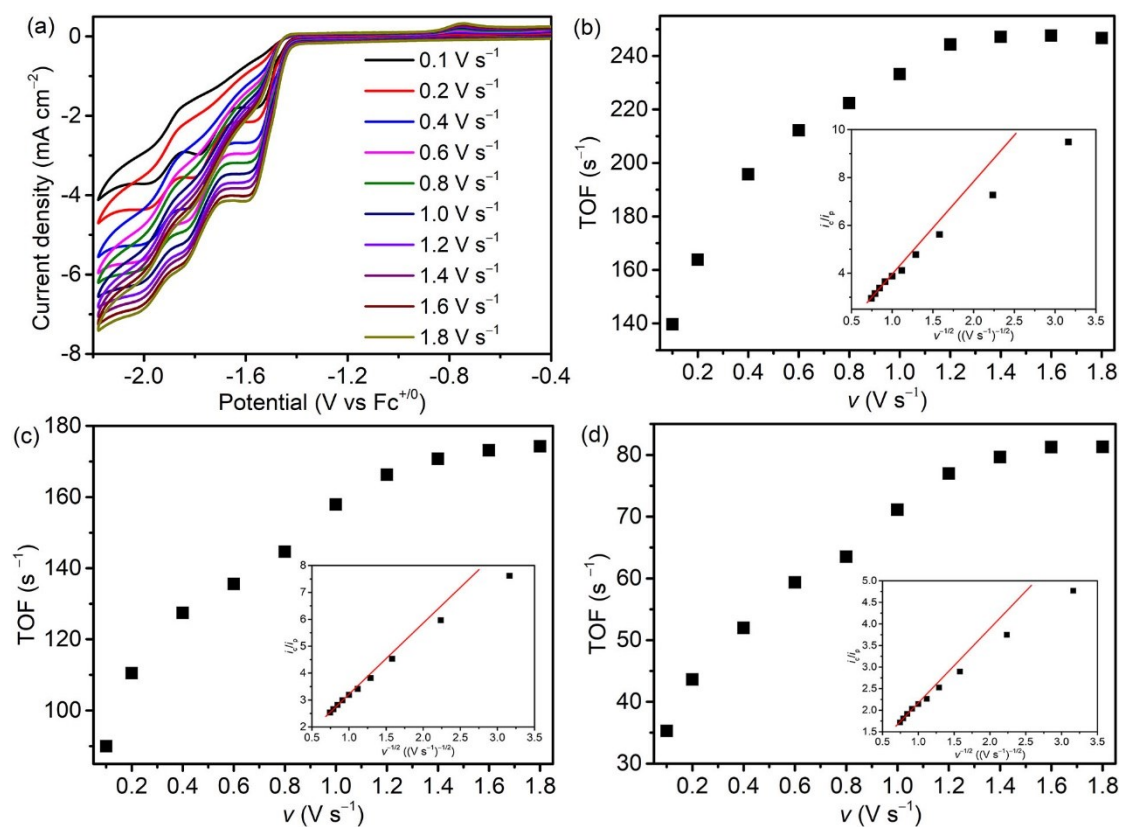

**Figure S38.** (a) CVs of complex [1-Br] (1 mM) in CO<sub>2</sub>-saturated CH<sub>3</sub>CN solution with 0.1 M TBAP and 5.51 M H<sub>2</sub>O as electrolyte at different scan rates (0.1 to 1.8 V s<sup>-1</sup>); The plots of TOF versus scan rate for (b) third catalytic wave, (c) second catalytic wave and (d) first catalytic wave, with an inset of  $i_p/i_p^0$  versus inverse square root of the scan rate, highlighting that steady-state conditions are accomplished at high scan rates (1.4–1.8 V s<sup>-1</sup>).

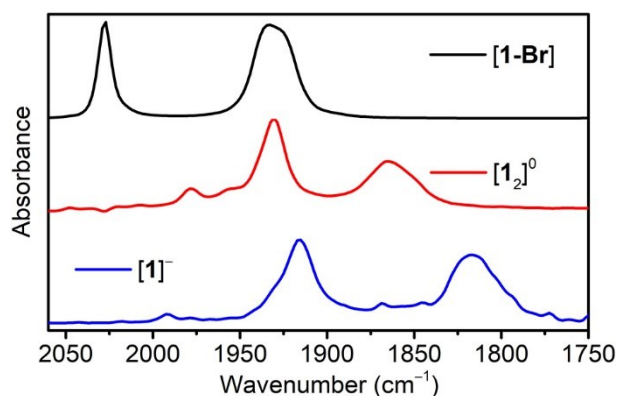

**Figure S39.** FTIR-SEC of [1-Br] (5 mM) in CH<sub>3</sub>CN solution (0.05 M TBAP, 5.51 M H<sub>2</sub>O) under Ar: resting state (black), singly reduced species (red), and doubly reduced species (blue).

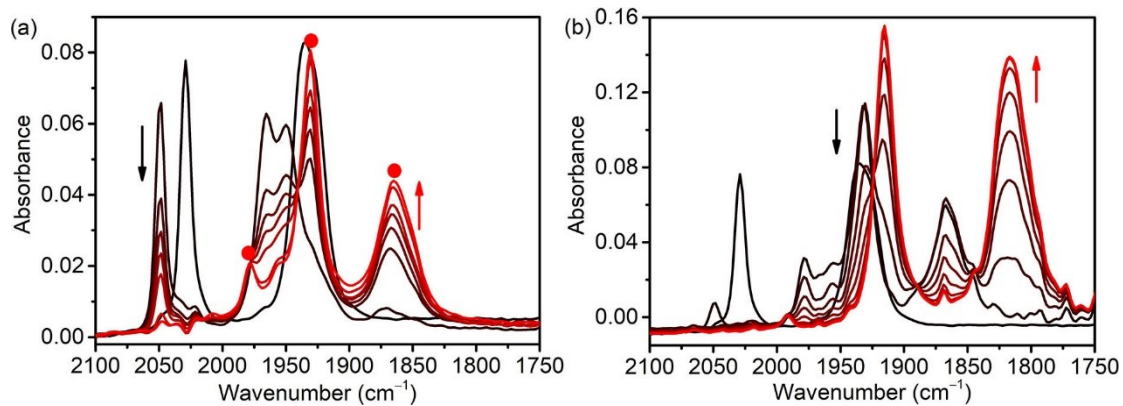

**Figure S40.** FTIR-SEC changes observed during the reaction of **[1-Br]** (5 mM) in CH<sub>3</sub>CN solution (0.05 M TBAP) with 5.51 M H<sub>2</sub>O under Ar at applied potential (a) -1.55 V and (b) -1.75 V. Black and red curves describe the starting and the final spectra, respectively.

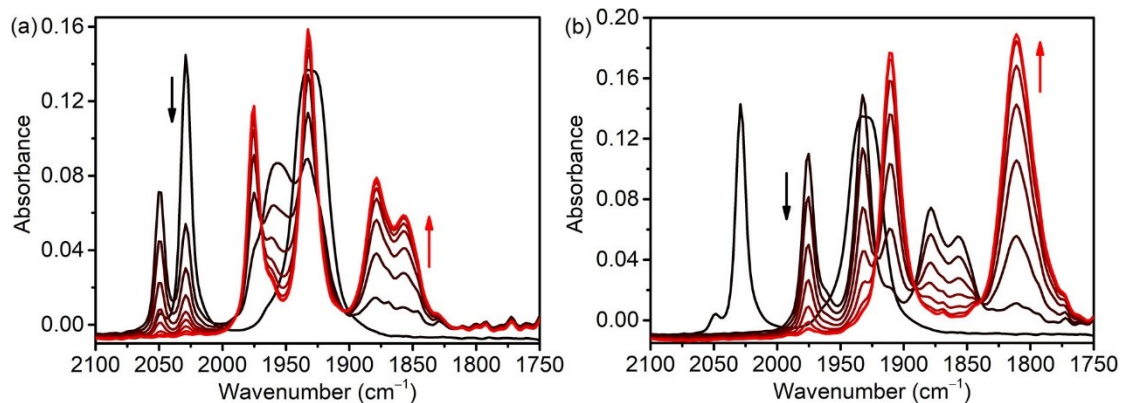

**Figure S41.** FTIR-SEC changes observed during the reaction of **[3-Br]** (5 mM) in CH<sub>3</sub>CN solution (0.05 M TBAP) with 5.51 M H<sub>2</sub>O under Ar at applied potential (a) -1.5 V and (b) -1.85 V. Black and red curves describe the starting and the final spectra, respectively.

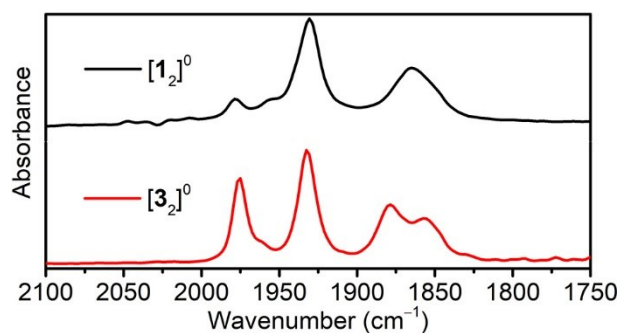

**Figure S42.** The ν<sub>CO</sub> stretching bands of FTIR-SEC spectra for complex **[1<sub>2</sub>]<sup>0</sup>** and **[3<sub>2</sub>]<sup>0</sup>** with 5.51 M H<sub>2</sub>O added in CH<sub>3</sub>CN with TBAP (0.1 M) as electrolyte under Ar.

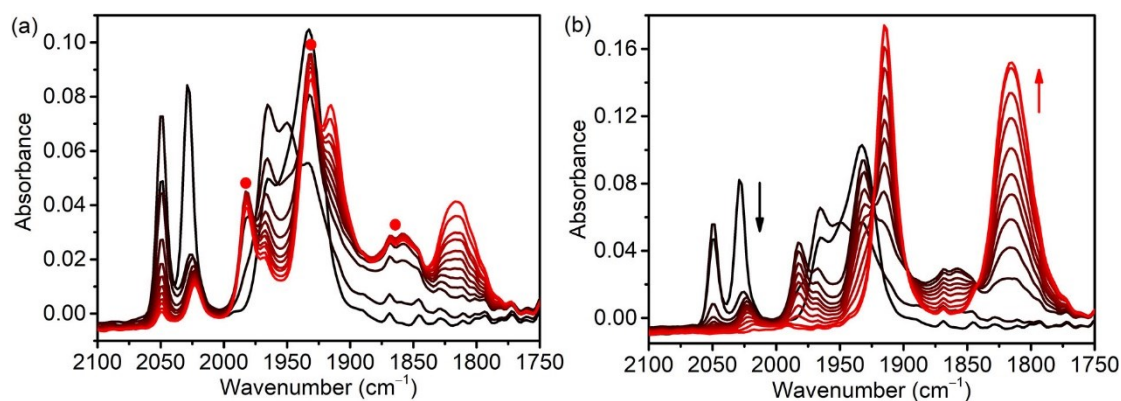

**Figure S43.** FTIR-SEC changes observed during the reaction of **[2-Br]** (5 mM) in CH<sub>3</sub>CN solution (0.05 M TBAP) with 5.51 M H<sub>2</sub>O under Ar at applied potential (a) -1.45 V and (b) -1.6 V. Black and red curves describe the starting and the final spectra, respectively.

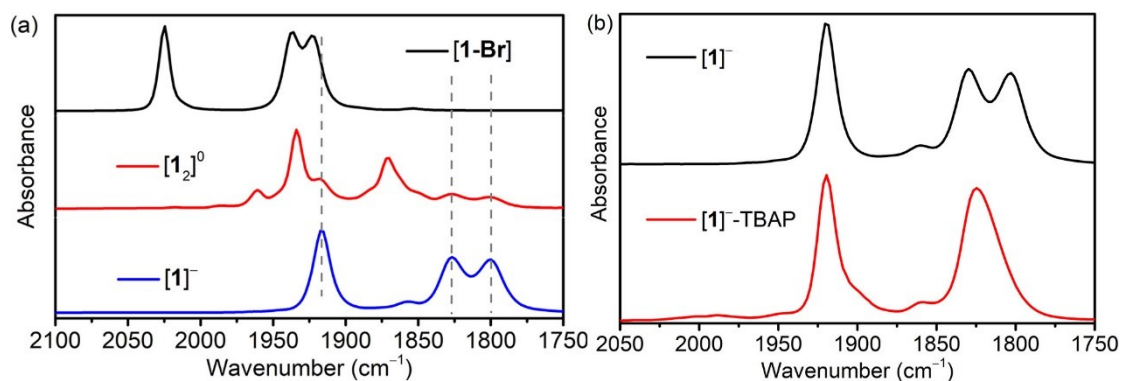

**Figure S44.** (a) FTIR spectra of **[1-Br]** (black) and its singly (red) and doubly reduced species (blue) prepared via chemical reduction with KC<sub>8</sub> in THF solutions; (b) The FTIR spectra of **[1]⁻** generated in the chemical reduction experiment without (black) and with (red) TBAP in THF solution.

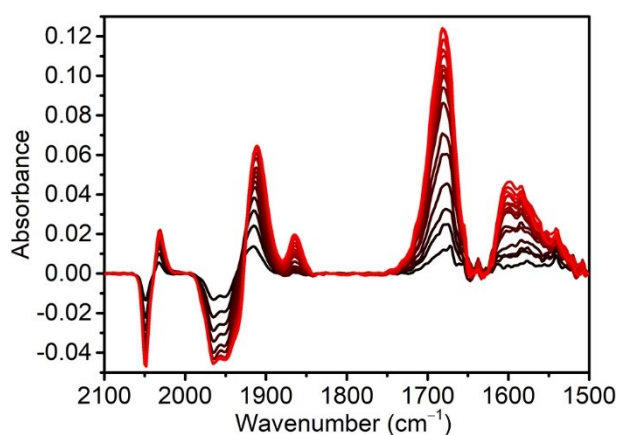

**Figure S45.** Differential FTIR-SEC spectra of **[1-Br]** (5 mM) in CO<sub>2</sub>-saturated CH<sub>3</sub>CN solution (0.05 M TBAP, 5.51 M H<sub>2</sub>O) at the applied potential -1.75 V. Black and red curves describe the starting and the final spectra, respectively.

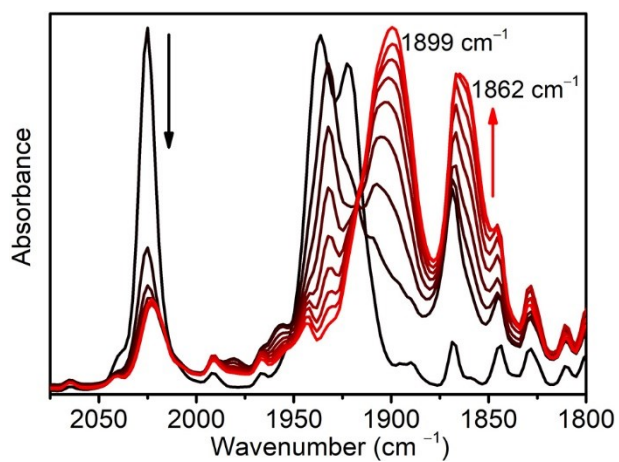

**Figure S46.** FTIR-SEC changes observed during the reaction (applied potential  $-1.75$  V) of **[1-Br]** (5 mM) in THF solution (0.05 M TBAP, 5.51 M  $H_2O$ ) under  $CO_2$ . Black and red curves describe the starting and the final spectra, respectively.

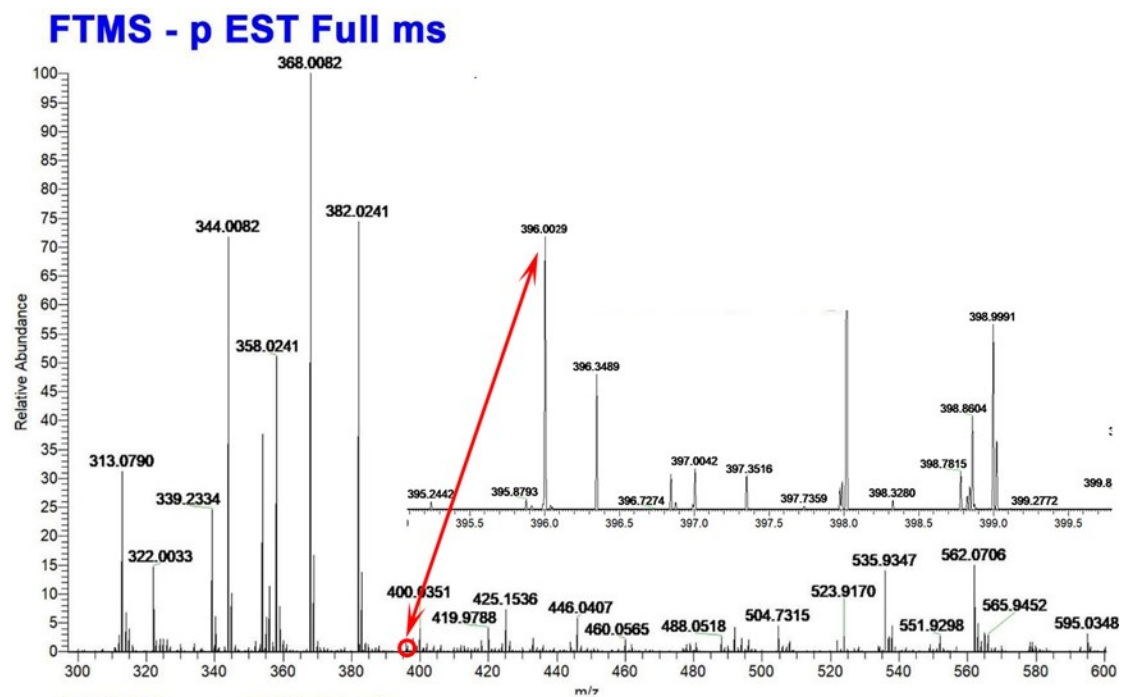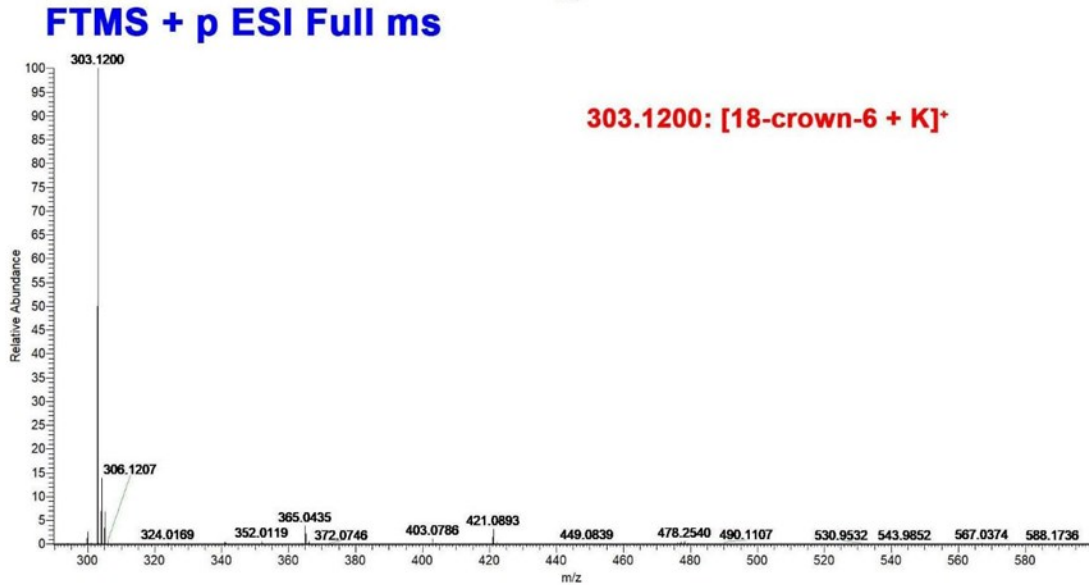

**Figure S47.** The HR-MS data of two-electrons reduced species [1]<sup>-</sup> mixed with CO<sub>2</sub>-containing THF solution. Inset: Partial spectrum with mass ratio from 395 to 400.

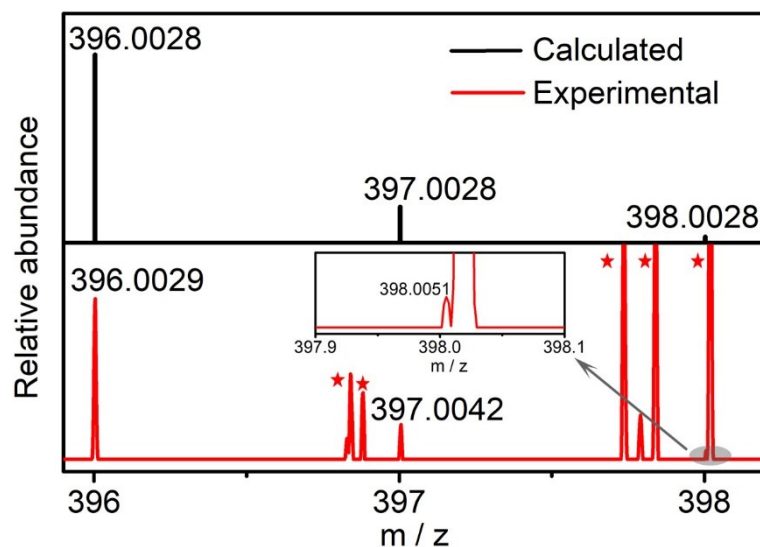

**Figure S48.** Experimentally observed (red) and calculated (black) spectra of (a)  $[1 + \text{CO}_2]^-$  after mixing a  $\text{CO}_2$ -containing solution with  $[1]^-$ . Note: (1) the red-star labelled signals represent other unknown species; (2) the eluent used for the HR-MS measurements contains methanol.

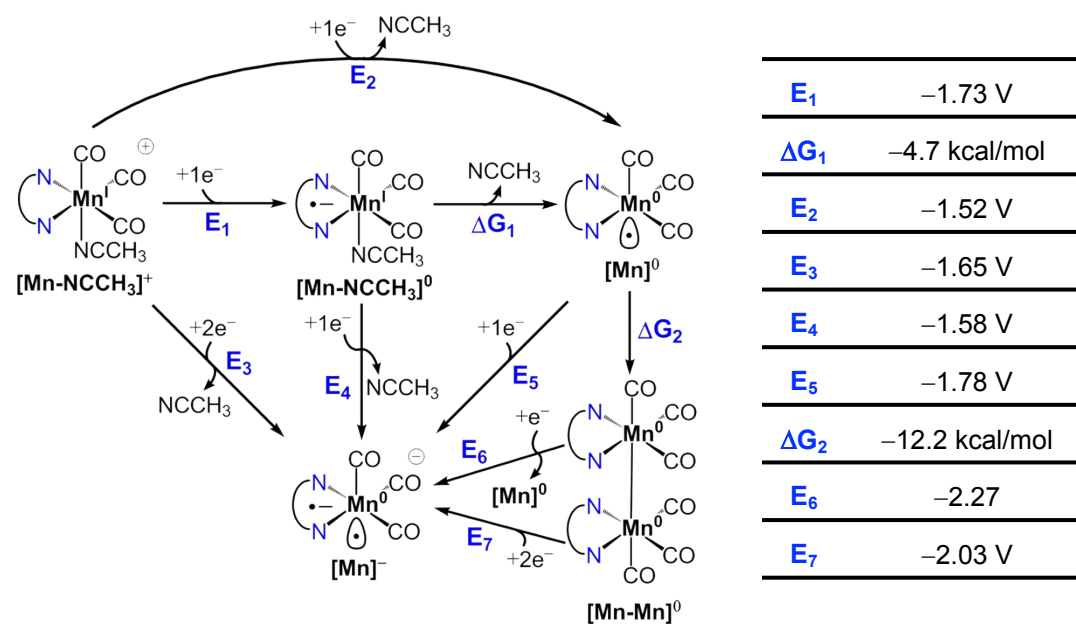

**Figure S49.** Catalyst activation and dimerization pathways for  $[\text{fac-Mn}(\text{bpy-CONHMe})(\text{CO})_3\text{NCCH}_3]^+$  ( $[\text{Mn-NCCH}_3]^+$  or  $[1-\text{NCCH}_3]^+$ ).

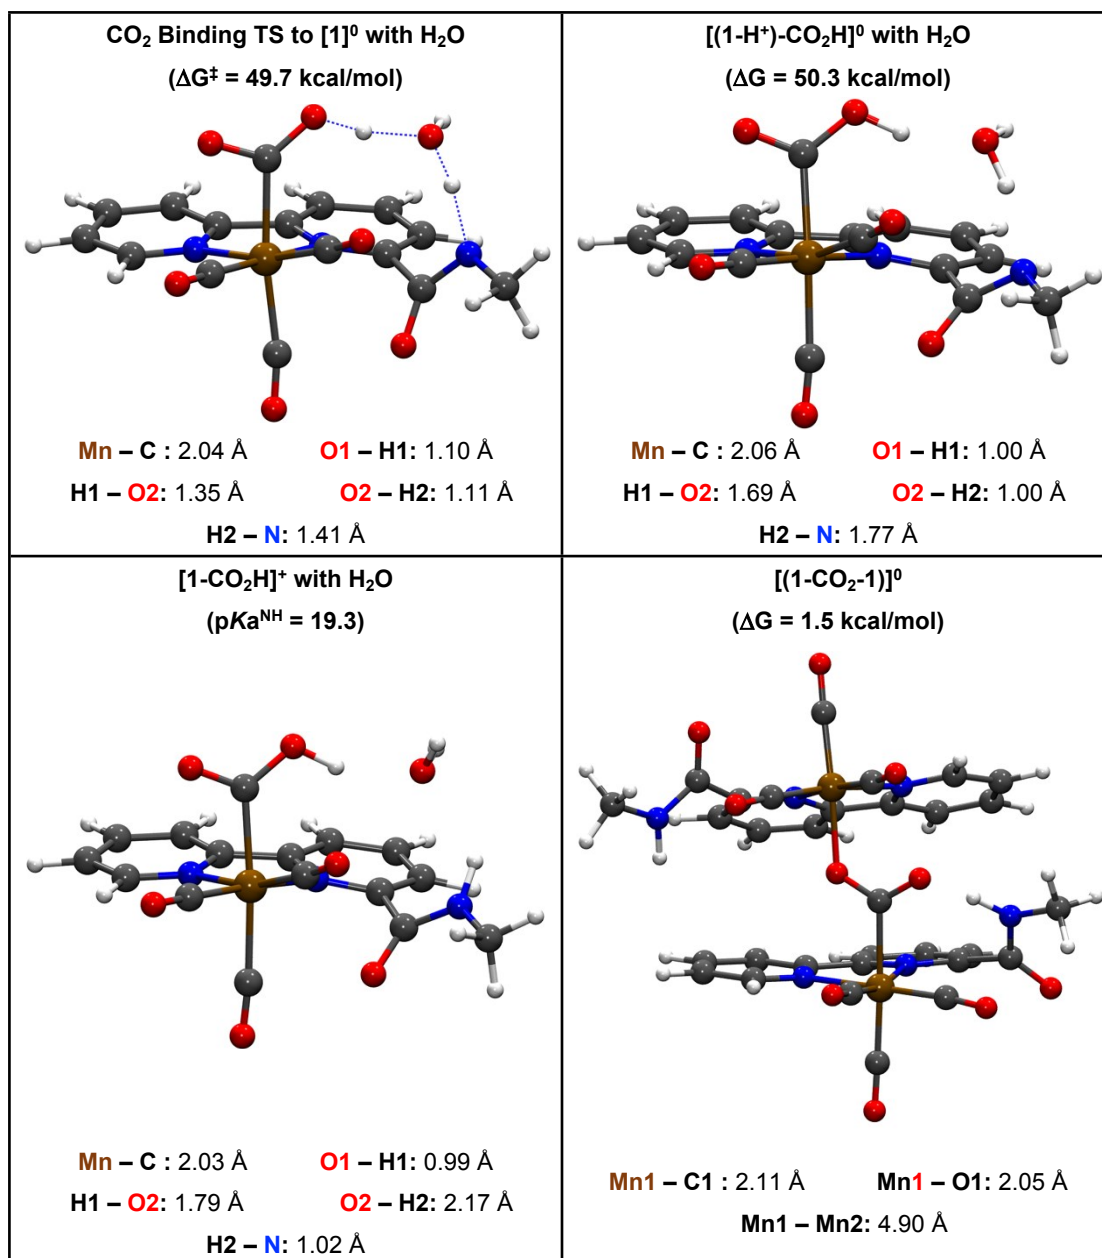

**Figure S50.** Optimized (a) transition state structure for CO<sub>2</sub> binding to [1]<sup>0</sup>, (b) structure for Mn<sup>II</sup>-COOH species with deprotonated ligand ([1-(H<sup>+</sup>)-CO<sub>2</sub>H]<sup>0</sup>) and (c) structure for Mn<sup>II</sup>-COOH ([1-CO<sub>2</sub>H]<sup>+</sup>) with and a water molecule.  $\Delta G^\ddagger$  and  $\Delta G$  are in units of kcal/mol with respect to separated reactants [1]<sup>0</sup>, H<sub>2</sub>O and CO<sub>2</sub>.



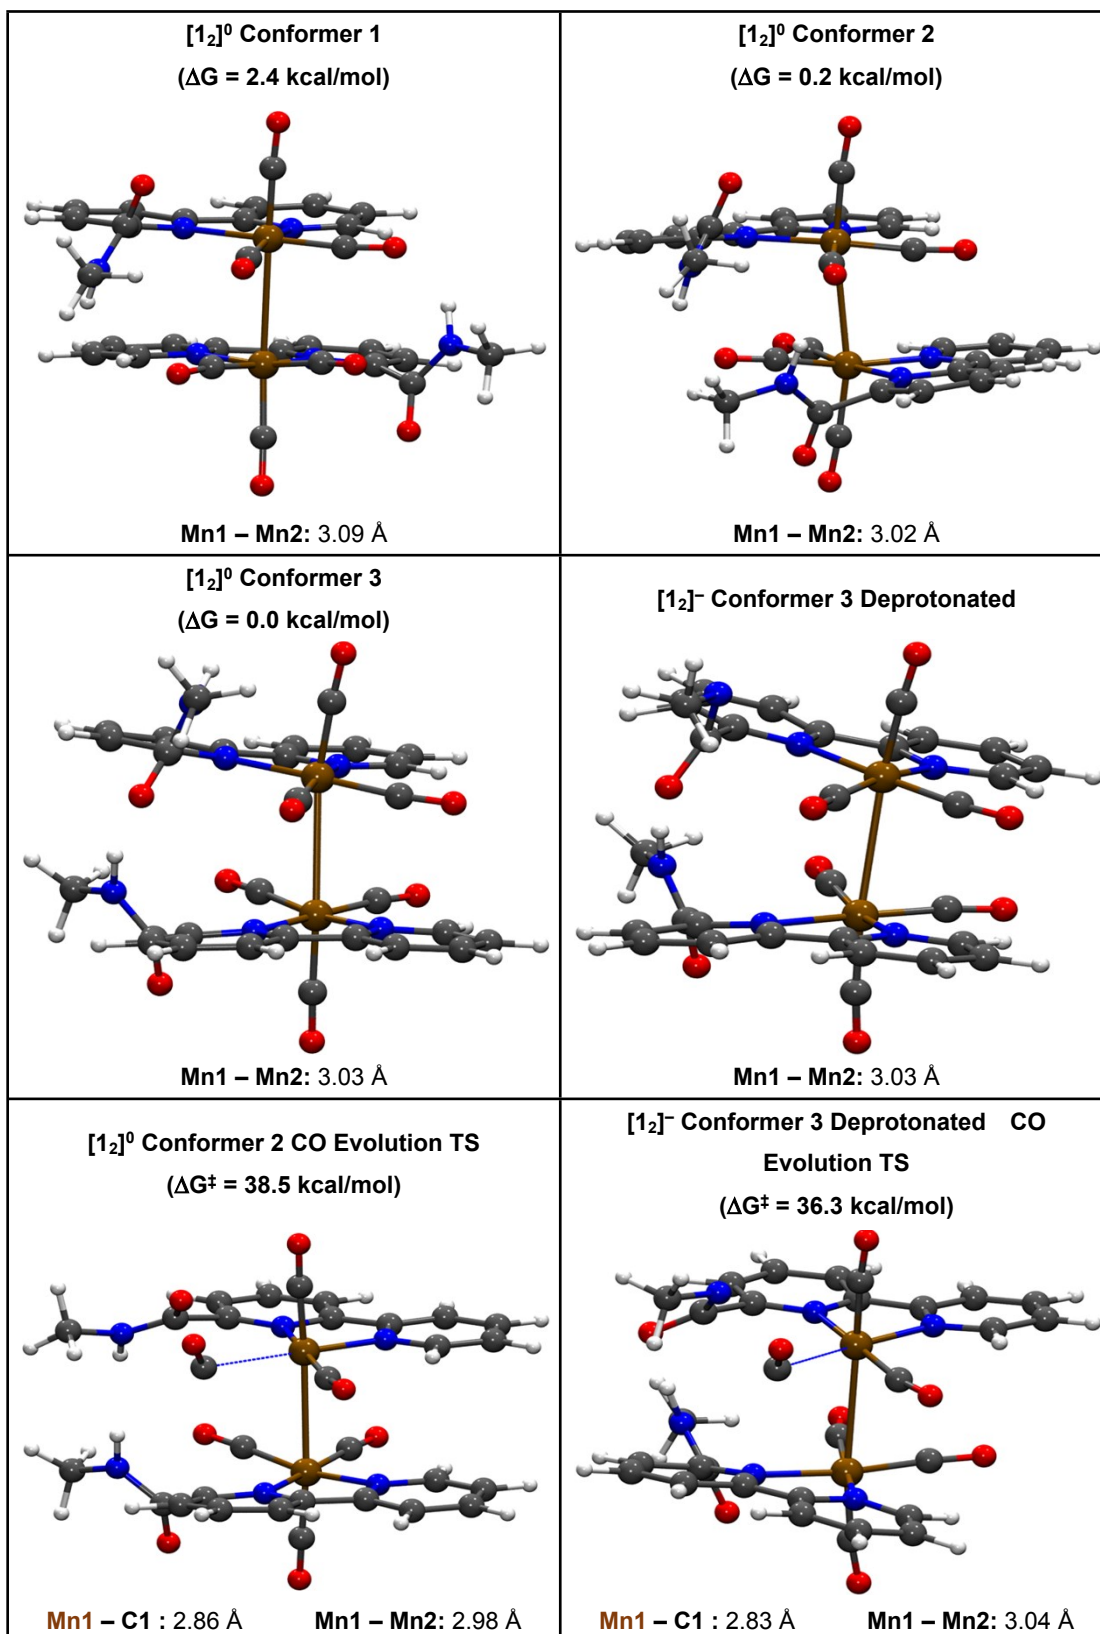

**Figure S51.** Optimized structures for [1<sub>2</sub>]<sup>0</sup> (a-c), (d) deprotonated form of [1<sub>2</sub>]<sup>0</sup>, transition states for CO evolution from (e) [1<sub>2</sub>]<sup>0</sup> conformer 1 and (f) deprotonated form of [1<sub>2</sub>]<sup>0</sup> conformer 3.  $\Delta G^\ddagger$  and  $\Delta G$  are in units of kcal/mol with respect to most stable [1]<sup>0</sup> conformer 3 except for last TS for which the reference is deprotonated [1<sub>2</sub>]<sup>-</sup> conformer 3.

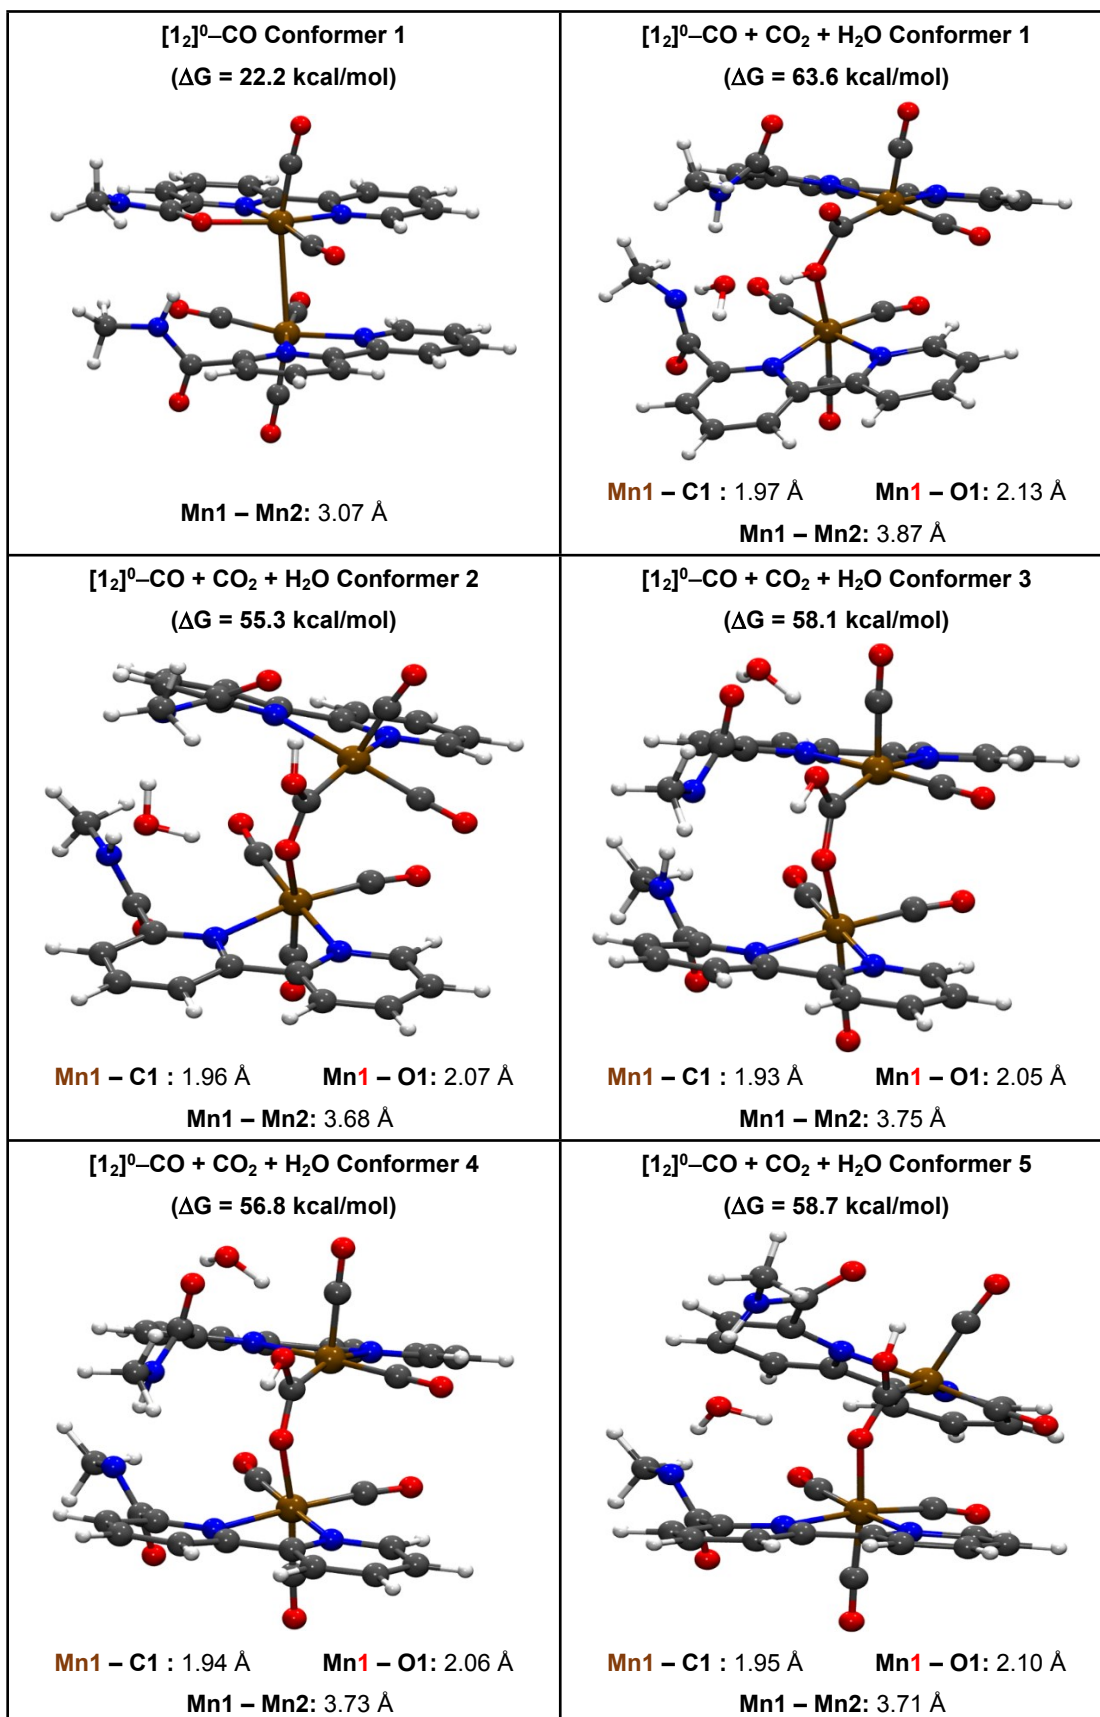

**Figure S52.** Optimized structures for (a) [1<sub>2</sub>]<sup>0</sup>-CO where one of the CO molecules has dissociated, (b-f) different conformers of species formed upon addition of CO<sub>2</sub> and H<sub>2</sub>O to [1<sub>2</sub>]<sup>0</sup>-CO.  $\Delta G$ s are in units of kcal/mol with respect to separated reactants [1<sub>2</sub>]<sup>0</sup>, H<sub>2</sub>O, CO<sub>2</sub> and CO.

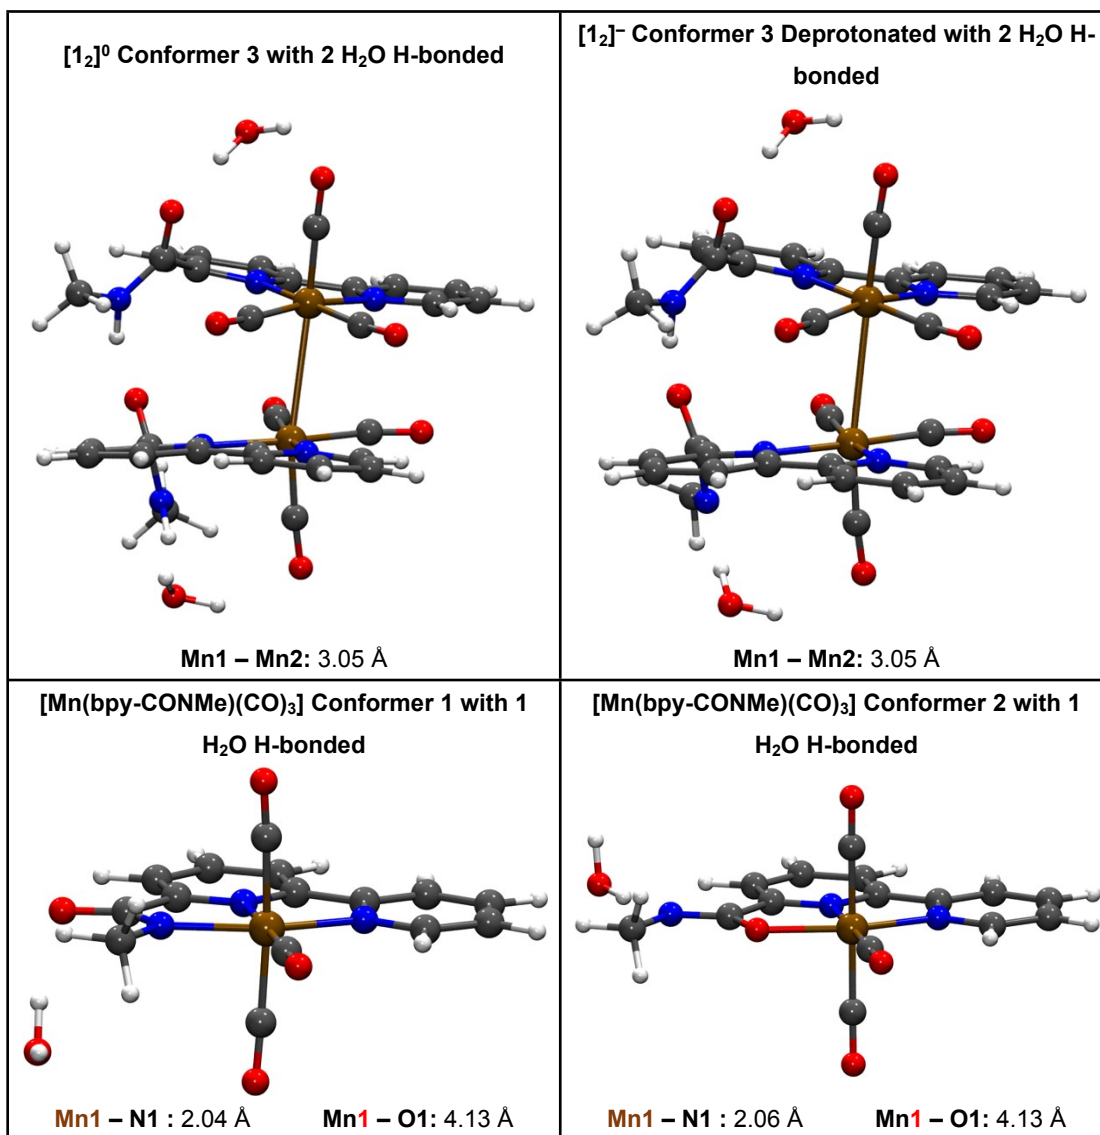

**Figure S53.** Optimized structures for (a) [1<sub>2</sub>]<sup>0</sup> conformer 3 with 2 H<sub>2</sub>O H-bonded, (b) [1<sub>2</sub>]<sup>-</sup> Conformer 3 Deprotonated with 2 H<sub>2</sub>O, (c) [Mn(bpy-CONMe)(CO)<sub>3</sub>] Conformer 1 with 1 H<sub>2</sub>O H-bonded and (d) [Mn(bpy-CONMe)(CO)<sub>3</sub>] conformer 2 with 1 H<sub>2</sub>O H-bonded.

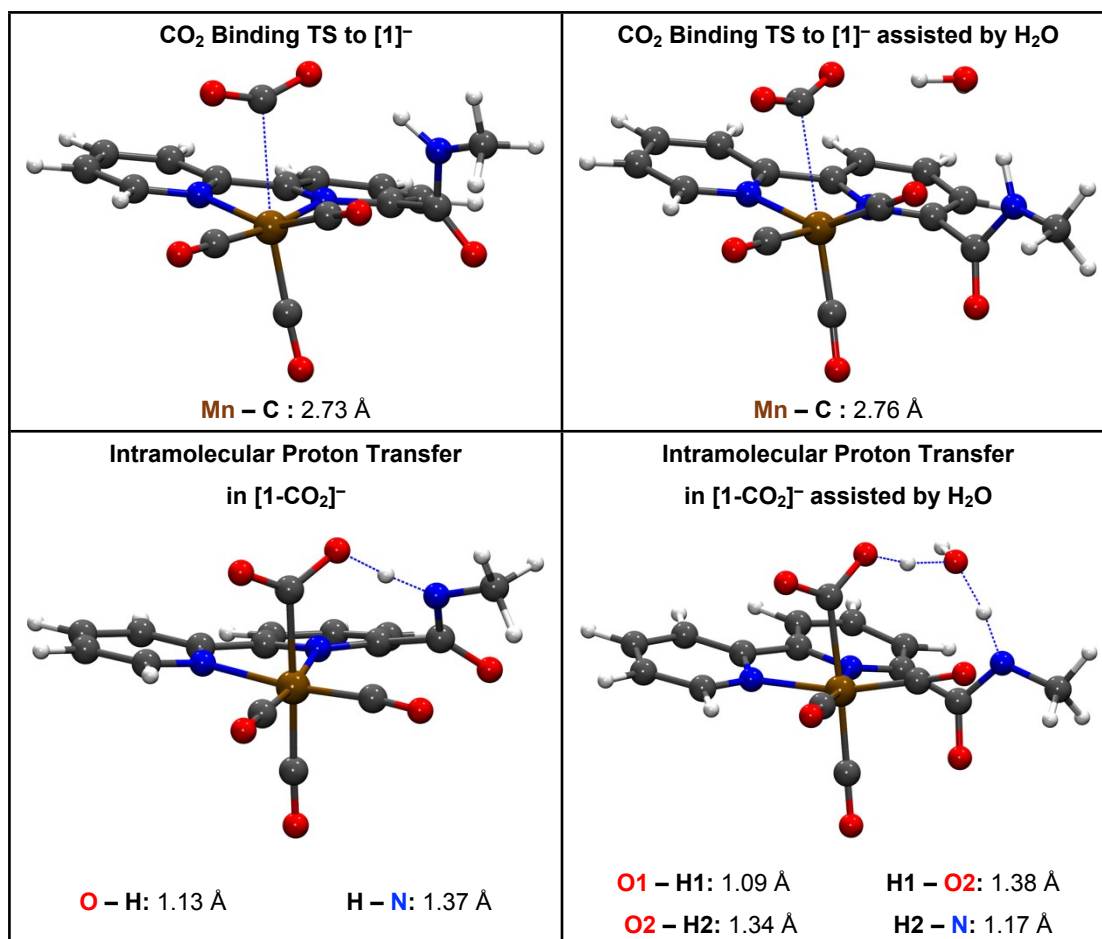

**Figure S54.** Optimized transition state structures for CO<sub>2</sub> binding to [1]<sup>-</sup> (top) and intramolecular proton transfer in [1-CO<sub>2</sub>]<sup>-</sup> (bottom) with and without assistance of a water molecule.

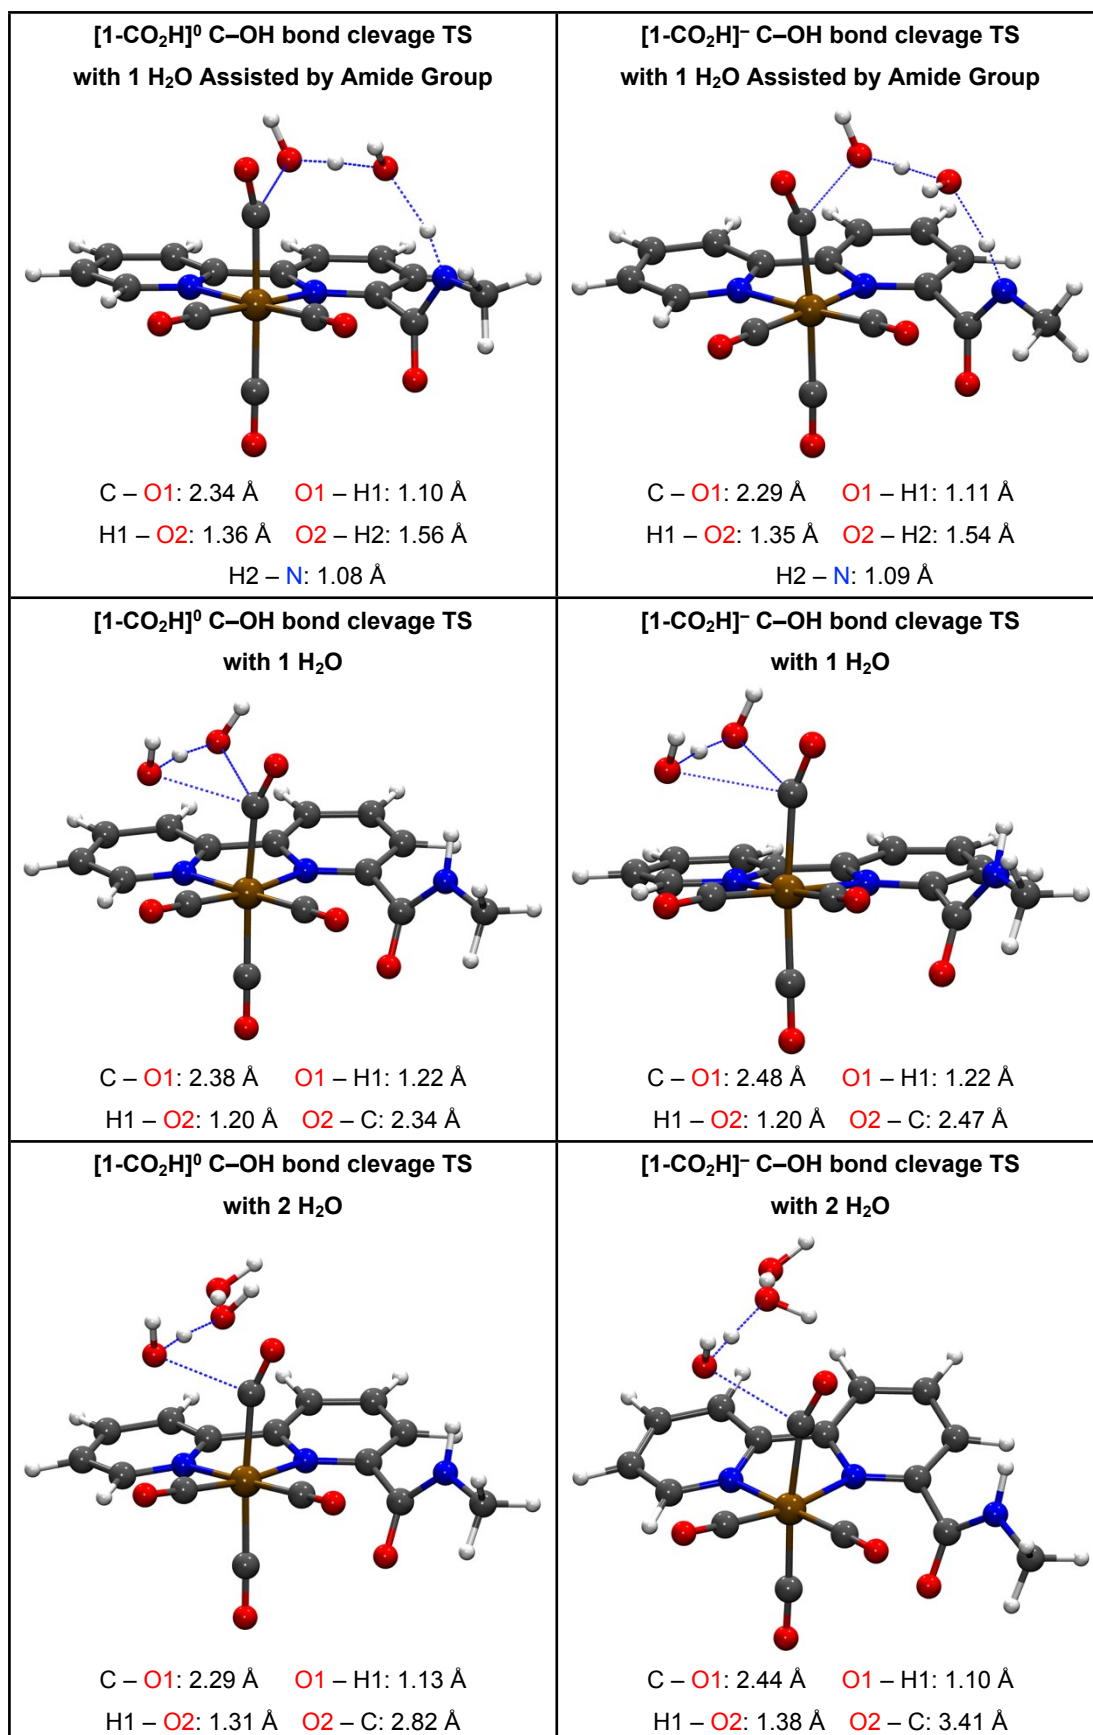

**Figure S55.** Optimized transition state structures for C–OH bond cleavage for [1-CO<sub>2</sub>H]<sup>0</sup> and [1-CO<sub>2</sub>H]<sup>-</sup> species using H<sub>2</sub>O as the weak Brønsted acid.

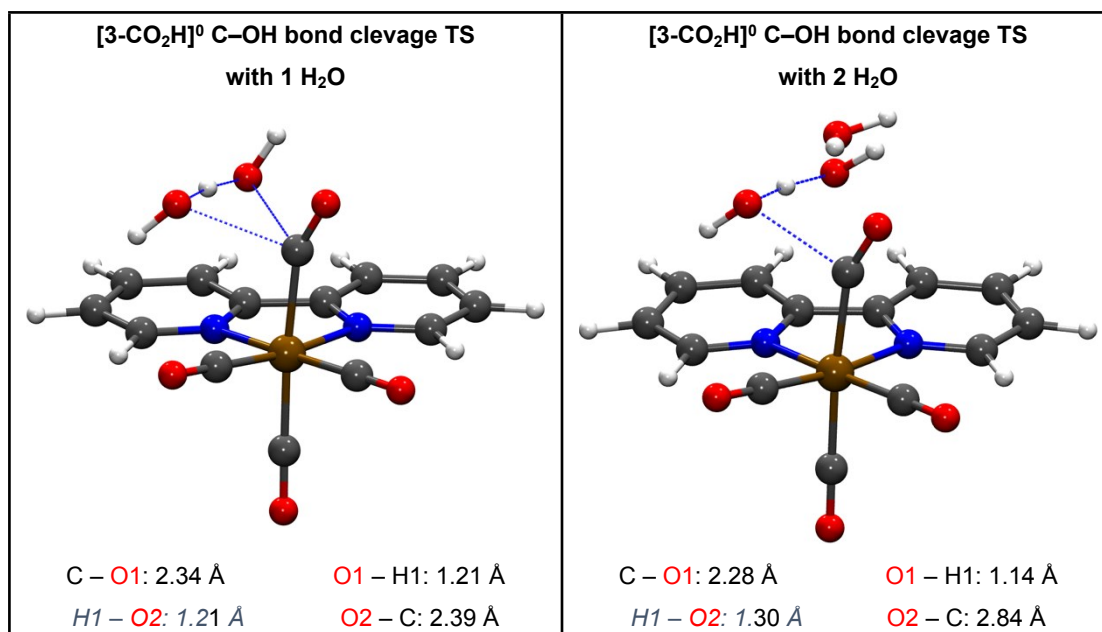

**Figure S56.** Optimized transition state structures for C–OH bond cleavage for [Mn(bpy)(CO)<sub>3</sub>CO<sub>2</sub>H]<sup>0</sup> ([3-CO<sub>2</sub>H]<sup>0</sup>) with 1 (left) and 2 (right) H<sub>2</sub>O molecules as the weak Brønsted acid.

**Table S1.** Representative bond lengths [Å] for [1-Br].

|         | [1-Br] |
|---------|--------|
| Mn-C1   | 1.818  |
| Mn-N1   | 2.032  |
| N1-C2   | 1.345  |
| C2-C3   | 1.382  |
| C3-C4   | 1.380  |
| C4-C5   | 1.388  |
| C5-C6   | 1.391  |
| C6-C7   | 1.480  |
| C7-C8   | 1.385  |
| C8-C9   | 1.381  |
| C9-C10  | 1.389  |
| C10-C11 | 1.383  |
| C11-N2  | 1.351  |
| Mn-N2   | 2.067  |
| Mn-C13  | 1.808  |
| Mn-C14  | 1.818  |
| C1-O1   | 1.144  |
| C13-O2  | 1.153  |
| C14-O3  | 1.109  |

**Table S2.** Crystal data and structure refinement for [1-Br].

| <b>Empirical formula</b>       | <b>C<sub>15</sub>H<sub>11</sub>N<sub>3</sub>O<sub>4</sub>MnBr</b>                         |
|--------------------------------|-------------------------------------------------------------------------------------------|
| Formula weight                 | 430.93                                                                                    |
| Temperature                    | 100 K                                                                                     |
| Wavelength                     | 0.71073                                                                                   |
| Crystal system                 | Monoclinic                                                                                |
| Space group                    | P 21/c                                                                                    |
| Unit cell dimensions           | a = 10.650(4) Å    α = 90°<br>b = 9.121(4) Å    β = 100.266°<br>c = 16.456(14)    γ = 90° |
| Volume                         | 1572.9(11) Å <sup>3</sup>                                                                 |
| Density (calculated)           | 1.523 mg/m <sup>3</sup>                                                                   |
| Absorption coefficient         | 1.985                                                                                     |
| F(000)                         | 856.0                                                                                     |
| Crystal size                   | 0.42 x 0.38 x 0.34                                                                        |
| Reflections collected          | 29067                                                                                     |
| Absorption correction          | Muti-scan                                                                                 |
| Data / restraints / parameters | 3618/0/219                                                                                |
| Goodness-of-fit on F2          | 1.038                                                                                     |
| R indices (all data)           | R1 = 0.0287    wR2 = 0.0709                                                               |



**Table S3.** Representative bond lengths [Å] for [K(18-crown-6)]<sup>+</sup>[1]<sup>-</sup>.

| [K(18-crown-6)] <sup>+</sup> [1] <sup>-</sup> |       |
|-----------------------------------------------|-------|
| Mn-C1                                         | 1.768 |
| Mn-N1                                         | 1.973 |
| N1-C2                                         | 1.370 |
| C2-C3                                         | 1.363 |
| C3-C4                                         | 1.426 |
| C4-C5                                         | 1.340 |
| C5-C6                                         | 1.406 |
| C6-C7                                         | 1.401 |
| C7-C8                                         | 1.417 |
| C8-C9                                         | 1.354 |
| C9-C10                                        | 1.395 |
| C10-C11                                       | 1.372 |
| C11-N2                                        | 1.391 |
| Mn-N2                                         | 2.005 |
| Mn-C13                                        | 1.749 |
| Mn-C14                                        | 1.751 |
| C1-O1                                         | 1.190 |
| C13-O2                                        | 1.181 |
| C14-O3                                        | 1.190 |

**Table S4.** Crystal data and structure refinement for [K(18-crown-6)]<sup>+</sup>[1]<sup>-</sup>.

|                                |                                                                                             |
|--------------------------------|---------------------------------------------------------------------------------------------|
| Empirical formula              | C <sub>27</sub> H <sub>35</sub> N <sub>3</sub> O <sub>10</sub> KMn                          |
| Formula weight                 | 655.13                                                                                      |
| Temperature                    | 100 K                                                                                       |
| Wavelength                     | 0.71073                                                                                     |
| Crystal system                 | Monoclinic                                                                                  |
| Space group                    | P 21/c                                                                                      |
| Unit cell dimensions           | a = 9.4091(12) Å    α = 90°<br>b = 15.768(3) Å    β = 94.907°<br>c = 25.766(5)      γ = 90° |
| Volume                         | 3808.7(11) Å <sup>3</sup>                                                                   |
| Density (calculated)           | 1.395 mg/m <sup>3</sup>                                                                     |
| Absorption coefficient         | 0.520                                                                                       |
| F(000)                         | 1688                                                                                        |
| Crystal size                   | 0.34 x 0.26 x 0.08                                                                          |
| Reflections collected          | 33806                                                                                       |
| Absorption correction          | Muti-scan                                                                                   |
| Data / restraints / parameters | 6480/453/643                                                                                |
| Goodness-of-fit on F2          | 1.026                                                                                       |
| R indices (all data)           | R1 = 0.0845    wR2 = 0.2382                                                                 |

**Table S5.** Representative bond lengths [Å] for [2-Br].

| <b>[2-Br]</b> |       |
|---------------|-------|
| Mn-C1         | 1.803 |
| Mn-N1         | 2.044 |
| N1-C2         | 1.343 |
| C2-C3         | 1.384 |
| C3-C4         | 1.382 |
| C4-C5         | 1.386 |
| C5-C6         | 1.391 |
| C6-C7         | 1.472 |
| C7-C8         | 1.390 |
| C8-C9         | 1.384 |
| C9-C10        | 1.386 |
| C10-C11       | 1.388 |
| C11-N2        | 1.349 |
| Mn-N2         | 2.090 |
| Mn-C13        | 1.823 |
| Mn-C14        | 1.809 |
| C1-O1         | 1.151 |
| C13-O2        | 1.147 |
| C14-O3        | 1.131 |

**Table S6.** Crystal data and structure refinement for [2-Br].

|                                |                                                                                             |
|--------------------------------|---------------------------------------------------------------------------------------------|
| Empirical formula              | C <sub>16</sub> H <sub>13</sub> N <sub>3</sub> O <sub>4</sub> MnBr                          |
| Formula weight                 | 446.13                                                                                      |
| Temperature                    | 100 K                                                                                       |
| Wavelength                     | 0.71073                                                                                     |
| Crystal system                 | Monoclinic                                                                                  |
| Space group                    | P 21/n                                                                                      |
| Unit cell dimensions           | a = 10.5955(4) Å    α = 90°<br>b = 10.5011(4) Å    β = 94.048°<br>c = 15.0027(6)    γ = 90° |
| Volume                         | 1665.10(11) Å <sup>3</sup>                                                                  |
| Density (calculated)           | 1.780 mg/m <sup>3</sup>                                                                     |
| Absorption coefficient         | 3.219                                                                                       |
| F(000)                         | 888.0                                                                                       |
| Crystal size                   | 0.28 x 0.24 x 0.2                                                                           |
| Reflections collected          | 26780                                                                                       |
| Absorption correction          | Muti-scan                                                                                   |
| Data / restraints / parameters | 3848/0/229                                                                                  |
| Goodness-of-fit on F2          | 1.023                                                                                       |
| R indices (all data)           | R1 = 0.0227    wR2 = 0.0515                                                                 |

**Table S7.** The current density of first and second oxidation wave for complex [1-Br] in Ar-saturated CH<sub>3</sub>CN with 0.1 M TBAP at different scan rate.

| Scan rate (V s <sup>-1</sup> ) | <i>i</i> <sub>ox1</sub> (mA cm <sup>-2</sup> ) | <i>i</i> <sub>ox2</sub> (mA cm <sup>-2</sup> ) | <i>i</i> <sub>ox1</sub> / <i>i</i> <sub>ox2</sub> |
|--------------------------------|------------------------------------------------|------------------------------------------------|---------------------------------------------------|
| 0.1                            | 0.02                                           | 0.11                                           | 0.18                                              |
| 0.2                            | 0.05                                           | 0.16                                           | 0.31                                              |
| 0.4                            | 0.14                                           | 0.34                                           | 0.41                                              |
| 0.6                            | 0.21                                           | 0.28                                           | 0.75                                              |
| 0.8                            | 0.31                                           | 0.35                                           | 0.89                                              |
| 1.0                            | 0.43                                           | 0.39                                           | 1.10                                              |
| 1.2                            | 0.5                                            | 0.42                                           | 1.19                                              |

**Table S8.** Catalytic data of selected Mn-based homogeneous catalysts together with the standard CO<sub>2</sub> reduction potentials and electrode equilibrium potentials. All the scan rates are at 100 mV s<sup>-1</sup>.

| Catalyst                                                                    | Solvent                                              | $E^0$ (V) | $E_{eq}$ (V) | $\eta$ (V) at catalytic current density –1.0 mA cm <sup>-2</sup> | Refs.     |
|-----------------------------------------------------------------------------|------------------------------------------------------|-----------|--------------|------------------------------------------------------------------|-----------|
| [1-Br]                                                                      | CH <sub>3</sub> CN + 9%<br>(5.51 M) H <sub>2</sub> O | -1.37     | -1.17        | 0.34                                                             | This work |
| [2-Br]                                                                      | CH <sub>3</sub> CN + 9%<br>(5.51 M) H <sub>2</sub> O | -1.37     | -1.17        | 0.76                                                             |           |
| [3-Br]                                                                      | CH <sub>3</sub> CN + 9%<br>(5.51 M) H <sub>2</sub> O | -1.37     | -1.17        | 0.84                                                             |           |
| [Mn(bpy- <sup>t</sup> Bu)(CO) <sub>3</sub> Br]                              | CH <sub>3</sub> CN + 5%<br>H <sub>2</sub> O          | -1.43     | -1.23        | 0.61                                                             | a)        |
| [Mn(mesbpy)(CO) <sub>3</sub> (MeCN)](OTf)                                   | CH <sub>3</sub> CN + 13%<br>H <sub>2</sub> O         | -1.31     | -1.11        | 0.81                                                             | b)        |
| [Mn(((MeO) <sub>2</sub> Ph) <sub>2</sub> bpy)(CO) <sub>3</sub> (MeCN)](OTf) | CH <sub>3</sub> CN + 13%<br>H <sub>2</sub> O         | -1.31     | -1.11        | ---                                                              | c)        |
| [Mn(dhbpy)(CO) <sub>3</sub> Br]                                             | <b>CH<sub>3</sub>CN</b>                              |           |              |                                                                  | d)        |
| [Mn(ptbpy)(CO) <sub>3</sub> Br]                                             | CH <sub>3</sub> CN + 5%<br>H <sub>2</sub> O          | -1.43     | -1.23        | 0.92                                                             | e)        |
| [Mn(HOPh-bpy)(CO) <sub>3</sub> Br]                                          | CH <sub>3</sub> CN + 5%<br>H <sub>2</sub> O          | -1.43     | -1.22        | 0.37                                                             | f)        |
| [Mn(Me(lmMe)bpy)(bpy)Br](PF <sub>6</sub> )                                  | CH <sub>3</sub> CN + 19%<br>H <sub>2</sub> O         | -1.28     | -1.08        | 0.44                                                             | g)        |
| [Mn(Me-lm-Py)(CO) <sub>3</sub> Br]                                          | CH <sub>3</sub> CN + 5%<br>H <sub>2</sub> O          | -1.43     | -1.23        | ---                                                              | h)        |

- a) Smieja, J. M.; Sampson, M. D.; Grice, K. A.; Benson, E. E.; Froehlich, J. D.; Kubiak, C. P. *Inorg. Chem.* **2013**, *52*, 2484; b) Sampson, M. D.; Nguyen, A. D.; Grice, K. A.; Moore, C. E.; Rheingold, A. L.; Kubiak, C. P. *J. Am. Chem. Soc.* **2014**, *136*, 5460; c) Ngo, K. T.; McKinnon, M.; Mahanti, B.; Narayanan, R.; Grills, D. C.; Ertem, M. Z.; Rochford, J. *J. Am. Chem. Soc.* **2017**, *139*, 2604; d) Franco, F.; Cometto, C.; Vallana, F. F.; Sordello, F.; Priola, E.; Minero, C.; Nervi, C.; Gobetto, R. *Chem. Commun.* **2014**, *50*, 14670; e) Franco, F.; Cometto, C.; Nencini, L.; Barolo, C.; Sordello, F.; Minero, C.; Fiedler, J.; Robert, M.; Gobetto, R.; Nervi, C. *Chem-Eur. J.* **2017**, *23*, 4782; f) Agarwal, J.; Shaw, T. W.; Schaefer, H. F.; Bocarsly, A. B. *Inorg. Chem.* **2015**, *54*, 5285; g) Sung, S.; Li, X. H.; Wolf, L. M.; Meeder, J. R.; Bhuvanesh, N. S.; Grice, K. A.; Panetier, J. A.; Nippe, M. *J. Am. Chem. Soc.* **2019**, *141*, 6569; h) Agarwal, J.; Shaw, T. W.; Stanton, C. J.; Majetich, G. F.; Bocarsly, A. B.; Schaefer, H. F. *Angew. Chem. Int. Ed.* **2014**, *126*, 5252

**Table S9.** List of computed  $\nu_{\text{CO}}$  bands for selected species (scaling factor = 0.957). Experimental values from FTIR-SEC are shown in paranthesis.

| Complex                                                                               | $\nu_{\text{CO}}$ ( $\text{cm}^{-1}$ ) |                        |
|---------------------------------------------------------------------------------------|----------------------------------------|------------------------|
|                                                                                       | Experimental                           | DFT                    |
| [1-Br] <sup>0</sup>                                                                   | 2025, 1932, 1926                       | 2015, 1939, 1929       |
| [1-MeCN] <sup>+</sup>                                                                 | 2048, 1965, 1949                       | 2036, 1965, 1952       |
| [1] <sup>0</sup>                                                                      |                                        | 1954, 1863, 1852       |
| [1 <sub>2</sub> ] <sup>0</sup>                                                        | 1978, 1932, 1865 (br)                  | 1955, 1915, 1864-1880  |
| [1] <sup>-</sup>                                                                      | 1917, 1818(br)                         | 1902, 1834, 1823       |
| [1-CO <sub>2</sub> ] <sup>-</sup>                                                     | ---                                    | 1955, 1871, 1864, 1641 |
| [1-CO <sub>2</sub> ] <sup>-</sup> with 1 H <sub>2</sub> O H-bonded                    | ---                                    | 1949, 1872, 1860, 1670 |
| [(1-H <sup>+</sup> )-CO <sub>2</sub> H] <sup>-</sup>                                  | ---                                    | 1986, 1900, 1893, 1656 |
| [(1-H <sup>+</sup> )-CO <sub>2</sub> H] <sup>-</sup> with 1 H <sub>2</sub> O H-bonded | ---                                    | 1993, 1913, 1898, 1653 |
| [1-CO <sub>2</sub> H] <sup>0</sup>                                                    | ---                                    | 2006, 1924, 1907, 1695 |
| [1-CO <sub>2</sub> H] <sup>0</sup> with 1 H <sub>2</sub> O H-bonded                   | ---                                    | 2002, 1922, 1903, 1672 |
| [1-CO <sub>2</sub> H] <sup>-</sup>                                                    | ---                                    | 1990, 1901, 1885, 1688 |
| [1-CO <sub>2</sub> H] <sup>-</sup> with 1 H <sub>2</sub> O H-bonded                   | ---                                    | 1990, 1902, 1885, 1688 |
| [1-CO] <sup>+</sup>                                                                   | ---                                    | 2100, 2021, 2007, 1978 |
| [1-CO] <sup>0</sup>                                                                   | ---                                    | 2083, 2001, 1984, 1953 |
